# Supplementary material for: CD161 Characterizes an Inflamed Subset of Cytotoxic T Lymphocytes Associated with Prolonged Survival in Human Papillomavirus–Driven Oropharyngeal Cancer
Source: Oxford University Press journal article supplement (doi:10.1158/2326-6066.cir-22-0454), 2023-01-12
Supplement: cir-22-0454_supplementary_table_1_suppst1.xlsx [file cir-22-0454_supplementary_table_1_suppst1.xlsx]

## Sheet: HPV E7 peptide pool
HPV16 E7 peptide pool:
E7 1-22: MHGDTPTLHEYMLDLQPETTDL;
E7 11-32: YMLDLQPETTDLYCYEQLNDSS;
E7 21-42: DLYCYEQLNDSSEEEDEIDGPA;
E7 31-52: SSEEEDEIDGPAGQAEPDRAHY;
E7 41-62: PAGQAEPDRAHYNIVTFCCKCD;
E7 61-82: CDSTLRLCVQSTHVDIRTLEDL;
E7 77-98: RTLE DLLMGTLGIVCPICSQKP;
E7 51-72 and E7 71-92 were excluded for the substandard purity (<95%).

## Sheet: Gene List for Fig. 1D
Top 25 up-/downregulated genes in CTLs from HPV-positive patients
Gene	1_AAACCCAAGCGAGAAA	1_AAACCCATCAGTCCGG	1_AAAGAACCATCGCTCT	1_AAAGAACTCATTTCGT	1_AAAGGTACATCGTGCG	1_AAAGTCCAGCATCAGG	1_AAATGGAAGACCCTTA	1_AACAAAGTCACTTTGT	1_AACAACCTCACTAGCA	1_AACAACCTCTAGTTCT	1_AACAAGACAAAGCAAT	1_AACCAACCAAACTAGA	1_AACCAACGTATGAGAT	1_AACCATGAGCATCCCG	1_AACCATGTCTCATAGG	1_AACCTGAGTACTCGTA	1_AACGGGAAGGTCATTC	1_AACGGGAAGTTGCGCC	1_AACGGGACATACTGTG	1_AACGTCAGTACAATAG	1_AACTTCTGTGAAAGTT	1_AAGAACACATATAGCC	1_AAGATAGGTATTGGCT	1_AAGCCATAGGTTGCCC	1_AAGCCATAGTACGAGC	1_AAGCCATGTGCAGTGA	1_AAGCGTTAGCCTCAAT	1_AAGCGTTCAGAGGCAT	1_AAGGAATTCGACACTA	1_AAGGTAAGTGAGATTA	1_AAGTACCCAACCACAT	1_AAGTACCGTACCGTCG	1_AAGTCGTGTATGAGAT	1_AAGTCGTGTCAAACGG	1_AAGTCGTTCCAAGCCG	1_AATCGACCAGATCCTA	1_AATCGTGGTGCCGTAC	1_AATGAAGGTGCTGTCG	1_AATGCCACAAGAGAGA	1_AATGCCATCGAAGGAC	1_AATGGAACACAATCTG	1_AATGGCTCACTAGGTT	1_AATTTCCGTCCAAATC	1_ACAAGCTGTCGCTTGG	1_ACACAGTCATAACGGG	1_ACACTGAAGTTAGTAG	1_ACACTGACATGAGTAA	1_ACAGCCGAGTCACGAG	1_ACAGGGAAGAGAGTTT
CXCL13	2.72922	1.75896	1.66249	-0.448358	2.40355	-0.376145	2.58934	1.2793	3.31903	3.06108	-0.37925	1.86109	2.57812	-0.410541	1.33172	1.23385	2.93424	2.50315	1.8543	1.47	-0.480637	-0.489388	1.83288	2.70348	1.82495	1.07879	1.60766	2.98681	-0.379356	1.06612	0.875601	-0.500218	2.14824	2.52588	1.42048	0.642764	0.592524	0.865013	2.56168	2.94277	4.83464	3.04162	3.58596	1.66208	1.44534	2.05207	3.00195	3.41444	3.1662
SPRR3	0.491284	0.535226	-0.861795	-0.816148	1.7336	1.37426	1.49183	-0.76946	-0.680922	0.337891	2.00403	1.88491	0.846546	2.13304	1.5401	1.2674	0.733992	1.36496	0.382262	1.66055	1.24731	-0.626833	1.63507	0.378748	1.29616	1.39049	-0.858353	0.535067	0.90543	1.00109	1.26023	-0.677921	-0.858789	1.10116	2.06467	-0.749305	1.36448	-0.819706	0.962019	1.04921	1.1314	-0.871726	1.27233	-0.799924	1.75573	1.28566	-0.751821	1.25698	0.842526
S100A9	1.21098	-1.12315	1.11961	1.19701	-1.34263	0.177368	0.705381	1.44366	0.733534	0.676551	0.868168	1.38839	0.6771	1.36677	0.889953	0.949979	0.68153	1.05542	0.702036	-1.21349	0.407465	0.693721	2.65573	0.406345	0.654303	0.721806	0.216785	0.838934	0.838711	1.00483	0.642235	-0.995601	0.749932	0.0115963	0.363765	1.05321	-1.06548	0.63327	-1.02701	0.744792	1.33308	1.58509	1.45825	1.15904	0.442517	0.647682	1.05661	0.412989	0.674876
FAM118A	1.33941	2.38363	1.21139	0.969098	1.50853	1.11807	2.21499	1.47202	1.88032	1.12101	1.49653	2.30398	1.40109	-0.712438	0.884882	-0.614462	2.48194	2.13398	1.49283	-0.678645	1.13791	0.524704	1.3093	0.544852	1.02907	2.24412	1.86412	0.800425	1.2972	0.685847	0.997948	-0.617207	-0.689956	-0.653496	2.59554	-0.646564	2.00065	0.984443	-0.625253	-0.440345	0.947685	1.23172	1.00243	0.919115	1.54528	1.6838	1.38331	-0.611731	1.67307
S100A8	0.720193	1.14669	1.46127	-1.01946	1.27874	0.436221	1.20886	-1.00542	0.674729	0.567973	1.15308	-0.936562	0.914795	-1.14061	0.837703	-0.85239	1.59791	0.885894	0.636485	1.29725	0.157178	0.146528	2.9558	0.653418	1.30275	-1.1065	1.44362	-0.97584	0.567901	0.201904	-1.02841	-0.848215	0.499261	0.754452	0.618835	0.775613	-0.919138	0.380752	-0.891131	1.41651	0.579414	0.548854	0.23921	0.330733	-1.18188	-1.0641	0.782992	0.654995	0.910143
RBPJ	1.98045	1.57927	1.76513	-0.722088	2.18005	3.0714	1.39766	0.678209	2.21311	2.07992	1.98243	0.526003	0.637691	3.07616	2.01168	2.49342	3.00954	1.58486	1.93124	2.43082	-0.828625	1.56027	2.10454	1.09962	1.93538	1.05092	-0.674718	1.20287	-0.645984	1.01929	0.845535	0.30892	1.03228	1.61106	2.09814	1.49876	2.08658	1.4472	1.97836	1.2709	1.76309	1.11499	1.0832	0.760971	2.17992	1.52305	2.00092	2.64072	0.971506
KRT13	-0.507604	1.1941	-0.598752	-0.551625	-0.652311	-0.589561	-0.431085	2.44945	-0.457679	0.706141	1.99054	1.13283	1.49972	3.39059	-0.546592	0.963823	2.27127	0.788968	0.919743	-0.571173	-0.438583	0.900058	2.26205	1.5957	1.43321	-0.595077	1.6061	-0.521417	-0.60982	-0.486851	-0.556996	0.982953	-0.581528	-0.532961	-0.645223	1.14694	-0.488849	1.39468	1.01162	0.677976	0.799488	-0.591263	0.675608	1.31887	2.01442	-0.572073	-0.502977	-0.442541	-0.393519
SPRR2A	0.951041	-0.571106	1.4531	1.21006	-0.707884	1.35175	0.795889	-0.588818	-0.508671	0.602135	1.78585	-0.552613	1.33645	-0.678344	-0.599557	0.828562	-0.637334	1.24901	-0.4781	-0.624587	-0.489237	-0.470188	-0.546116	0.796493	-0.628589	1.36528	1.42119	-0.57375	1.54296	1.58944	1.23968	-0.499558	-0.634819	-0.585869	1.67421	0.996403	-0.540464	-0.607837	1.52736	1.06159	0.681292	-0.644749	0.581651	-0.598952	-0.695288	-0.625525	-0.554729	0.819213	0.724176
IFI44L	1.70506	1.07518	-0.504235	1.25277	2.03191	1.49207	-0.50449	-0.47504	-0.508077	1.329	-0.453748	2.91498	1.6905	-0.552163	1.21459	-0.502493	2.98681	0.567731	0.75168	2.09208	2.40191	-0.494465	1.64042	2.87777	-0.482685	1.52662	2.27109	-0.502152	-0.502777	-0.501563	-0.544485	-0.529816	-0.554116	-0.438643	-0.402069	-0.529722	-0.511293	2.45601	-0.493154	0.796465	2.79411	1.55302	0.819361	-0.519914	2.789	1.36856	-0.540052	2.62863	1.27435
SRGAP3	-0.395431	1.54446	-0.420463	2.66554	-0.393843	-0.412646	1.15537	3.41948	2.95731	1.82571	-0.397446	1.45363	1.78217	-0.439026	-0.406128	-0.40034	1.95037	0.914173	2.80601	3.32843	-0.397576	2.38154	1.3966	-0.407086	-0.410518	2.0422	2.08594	1.54416	2.26342	2.1837	-0.427838	-0.409091	-0.434097	-0.39102	-0.393994	1.47228	1.38513	-0.42667	2.09259	1.92778	0.941615	2.15441	-0.333589	1.71473	2.62019	-0.41168	1.47399	1.97234	-0.385922
KRT19	1.51947	-0.432481	2.17735	-0.471448	-0.489645	2.0545	1.26904	1.66746	-0.37519	1.63394	2.59928	-0.420658	1.18075	2.61463	-0.437867	-0.364763	-0.467433	1.0819	1.25934	1.91199	-0.354246	-0.336829	4.85313	-0.357176	-0.463011	-0.473173	-0.4952	1.61024	2.29692	1.45349	2.79797	-0.377784	2.0894	1.62359	2.52649	2.41406	-0.403127	1.8514	-0.379038	1.50782	-0.276036	-0.510288	-0.0663939	-0.455787	2.65075	1.91451	1.54525	1.3026	-0.307585
MX1	0.941294	0.940682	2.2686	1.11958	-0.322397	2.17968	-0.68234	1.07709	1.31149	2.09689	-0.503765	2.9371	-0.66559	-0.632607	-0.553482	0.643144	1.39337	1.29826	2.16597	-0.555694	0.612735	1.16534	0.849474	1.54025	1.32469	-0.494618	-0.606055	-0.612534	1.62615	0.802151	1.15676	2.45228	-0.66716	-0.484237	-0.333899	-0.677126	-0.653373	-0.662752	-0.632497	1.29885	1.35308	3.5012	0.0321303	1.10077	-0.474421	1.29989	0.83698	1.24484	1.48839
LCN2	2.29488	-0.444738	2.11985	1.78513	-0.521655	-0.489599	1.20875	1.60322	-0.399506	-0.241048	-0.453807	-0.43301	1.8654	-0.524373	-0.458627	1.25939	1.92847	1.00934	1.97945	-0.477667	1.22664	-0.370637	3.20855	1.1998	-0.479174	-0.491226	2.07201	1.55364	2.23801	-0.419277	1.82486	-0.396458	-0.494354	-0.442736	-0.517116	-0.435718	-0.422138	-0.473666	1.32672	0.791172	1.02865	-0.501409	0.794888	1.71685	-0.524404	-0.477778	2.90874	-0.388567	1.85356
KLRB1	-0.597779	1.4894	-0.540612	1.68752	2.32702	3.2086	1.29851	-0.578471	0.312792	0.683709	1.72653	0.479591	1.17776	-0.597401	-0.573263	0.791877	1.61677	0.958382	-0.800027	2.36329	1.85948	1.01111	-0.671442	-0.872194	2.40066	-0.473737	2.01686	0.616653	1.22678	-0.706932	-0.685101	0.75564	-0.666713	-0.510463	-0.265163	1.38901	2.11061	2.19832	2.02913	-1.10818	1.52093	1.63891	0.748778	-0.652553	-0.417581	0.936128	-0.759108	-0.785508	-0.806334
FKBP5	1.70353	1.44778	-0.640054	-0.632853	2.28551	-0.657559	1.03752	1.88271	-0.694469	2.01911	1.48575	-0.664378	-0.735942	-0.598008	0.889029	1.78372	1.7906	-0.75424	1.40833	-0.659884	0.475803	0.416381	-0.692011	0.469013	-0.663916	1.17687	-0.62988	1.43238	1.38202	0.647588	2.15667	1.82495	1.94692	1.80093	1.48312	1.38602	1.28306	-0.632916	1.17494	-0.179006	1.1389	2.03873	0.831958	-0.650874	1.64015	1.72567	1.80506	-0.701382	-0.73922
STAT1	-0.701795	-0.749006	-0.644856	2.57968	1.77853	-0.633101	-0.829933	1.89337	0.444687	1.33972	-0.650543	0.633014	-0.844473	-0.66728	-0.677406	0.999254	-0.632485	0.0703579	2.0145	-0.66146	-0.814672	0.307478	0.612707	0.293008	-0.648302	-0.610721	-0.676436	-0.727905	-0.631123	-0.765386	-0.733239	0.39874	1.1591	0.821364	-0.48612	0.648954	-0.773422	1.62052	-0.774709	0.376275	1.01522	2.38996	0.41134	0.89038	2.45771	-0.656708	0.640489	0.384915	-0.845208
HLA-DRB5	-0.347995	-0.405198	-0.341175	-0.413287	-0.191033	-0.32315	-0.43964	-0.345038	-0.428105	3.38394	-0.3156	-0.424327	-0.434925	-0.380234	-0.345042	-0.427231	-0.318949	-0.471014	1.50542	2.5335	-0.427767	2.42547	-0.38577	-0.478718	-0.330799	-0.302488	2.80029	-0.384114	-0.333054	-0.403692	-0.410926	-0.457733	-0.4074	2.15235	-0.19898	1.95808	1.84999	-0.408859	-0.403881	-0.531228	2.10911	-0.402726	1.40756	-0.38959	-0.28347	3.66968	3.00633	-0.435609	-0.43369
S100A7	1.24057	-0.478882	-0.53724	-0.49687	-0.594884	-0.534903	-0.420889	-0.49941	1.85259	0.717564	2.72694	1.28636	0.9404	2.28776	-0.505662	1.08058	-0.532088	-0.363922	-0.418878	-0.520655	-0.427381	-0.415077	1.21812	-0.408775	-0.524984	2.6138	-0.527072	-0.484002	1.97096	-0.460139	-0.50046	1.10655	-0.515607	-0.504341	-0.589312	-0.466647	-0.459636	-0.499649	1.1383	-0.228585	1.5294	-0.522183	0.639639	-0.497746	-0.571856	2.98583	-0.463851	1.06797	0.931464
NEAT1	-0.140237	0.0583449	0.893613	1.11738	1.35289	1.22945	0.762301	-0.497767	2.25289	1.169	0.800188	1.58119	0.6385	2.97029	-1.60496	-0.582808	0.893313	0.149262	0.31306	0.699301	1.26707	-0.217944	0.870033	0.828935	0.871378	1.31811	-0.14922	0.540437	1.64185	-0.0772283	1.65268	1.31591	0.737723	-0.144074	0.595761	0.895105	0.472284	0.793934	1.39127	-0.133704	0.674066	1.03321	0.421167	0.866252	0.855132	0.461231	1.15915	0.137665	0.36216
ID2	0.94745	2.20178	1.84943	0.587904	-0.50626	-0.67727	-0.842441	-0.711616	1.77861	0.444613	0.602609	2.20945	1.41762	2.13085	2.11194	-0.82478	1.98966	0.356711	1.35554	-0.703686	-0.826814	0.58	2.29436	2.02662	1.31011	1.81593	1.77711	2.22341	1.94907	1.77642	1.17579	0.162583	1.97439	1.42585	1.29076	0.889315	-0.802246	2.53481	0.267624	1.17212	1.28318	-0.774763	-0.969686	0.569939	2.26121	1.28906	1.67044	1.21669	0.0483629
EPSTI1	0.675824	1.32588	-0.707471	1.53737	-0.451148	-0.679275	1.57306	-0.724182	1.7031	1.35092	-0.674116	-0.860687	1.44297	1.55077	-0.722449	1.66117	-0.673335	1.45196	1.79638	-0.71432	-0.876627	-0.891478	0.581192	1.49573	-0.694277	-0.644307	-0.755942	-0.791006	-0.692258	-0.82898	0.896145	1.33425	1.08662	0.833597	1.75015	0.586532	1.56786	-0.82625	0.467924	-0.385964	0.997216	2.66209	0.103718	-0.795944	1.72319	1.7286	-0.882158	1.6267	1.14158
MT-ND6	2.37421	0.788574	1.84221	-0.560636	-1.13148	-0.79753	0.445433	0.651347	0.52989	1.51278	0.591714	1.36337	0.276175	-0.538546	1.36126	-0.704838	0.908568	0.201433	-0.70102	-0.765471	1.37971	0.376023	1.15894	0.55399	-0.798408	0.940235	-0.638173	-0.71626	2.36437	-0.713729	2.16088	-0.600028	1.29848	1.08743	2.14206	0.777532	0.639216	1.06679	-0.743722	-0.25512	0.187779	-0.522988	0.886118	0.913668	-0.83844	0.893868	-0.568238	1.05402	0.257224
HIST1H1E	0.858862	0.96828	1.47912	-0.577352	-0.556777	-0.570408	-0.632269	-0.593504	-0.620876	0.663293	1.72034	-0.600499	1.08057	-0.546475	-0.588406	-0.625451	1.30811	1.30813	1.92078	-0.57684	0.626446	-0.638272	0.825825	1.20867	1.2553	-0.570353	-0.564366	-0.595634	2.79957	-0.609864	-0.575055	-0.621393	-0.563646	-0.599939	-0.559198	0.907145	1.47414	-0.576269	-0.617807	-0.0246915	-0.666332	-0.559533	-0.015704	-0.582965	-0.550872	1.24154	-0.597792	0.645962	-0.651173
LTB	-0.197479	-1.18568	-1.04589	-0.0348384	-0.842069	0.205324	-1.30253	-1.10804	-0.419442	-1.51704	-1.06914	-1.22209	0.516889	-1.06241	-0.0331862	-0.447605	-1.03714	-1.41545	-0.517521	-1.07291	0.181057	-1.30805	-1.1886	-1.35105	-1.05723	-1.00959	-1.08338	-1.16172	-1.02728	-1.21389	-1.15623	-1.30461	-1.12985	-0.0745907	0.620654	-1.22002	-1.22207	-0.015486	-1.22938	-1.19836	-1.38669	-1.11602	-1.16359	-1.14434	-0.948043	-1.06741	-0.265456	0.389773	-0.604925
ISG15	-0.888759	0.736952	-0.906453	1.24187	-0.532793	0.684454	-1.09971	-0.892098	1.05236	0.243601	1.6323	0.969538	0.860554	-1.01903	0.425144	0.446358	1.22966	0.425962	0.689259	-0.899343	-1.07144	-0.125002	1.01744	1.46105	-0.869922	-0.803343	0.615692	1.13464	-0.889434	0.0991945	0.354096	-0.115134	-1.07377	0.447839	-0.550909	-1.09049	0.0843931	1.26946	0.0543978	-0.635322	2.09516	1.80742	0.272366	-1.01316	-0.771058	-0.887743	1.85263	1.35058	0.85469
CD69	-1.01963	-1.01265	1.4615	-0.977423	0.900505	-0.927033	-1.11264	-0.988043	0.882346	-0.681264	1.04425	0.543861	1.20223	1.4413	0.747827	-0.147995	-0.933205	-0.0437129	1.52526	0.383132	0.97954	-1.12449	-1.03792	-0.224112	-0.943737	-0.918983	1.07719	-1.00788	1.5568	-0.0100827	0.344084	-1.0948	2.44091	0.151027	-0.853872	0.561087	0.00194497	1.42233	-1.06597	0.857144	-0.422767	2.32635	0.419002	2.14356	-0.867308	0.385474	0.561997	-1.09964	0.106426
TNFSF9	-0.20171	-0.219502	-0.210198	-0.225586	-0.173046	-0.203946	-0.21936	-0.204119	-0.219084	-0.210694	-0.196702	-0.222945	2.57849	-0.224376	3.85672	-0.217772	-0.202049	-0.218429	-0.218975	-0.207437	-0.216797	-0.216712	-0.211074	2.78053	-0.204487	-0.19862	-0.217406	-0.213709	-0.209125	-0.21539	-0.225522	-0.226617	-0.227319	-0.192474	-0.174524	-0.223594	-0.21844	-0.224699	-0.213554	-0.21161	-0.215095	-0.227088	-0.206776	-0.218132	-0.198331	-0.206229	-0.227008	-0.219512	3.98983
RPS21	-0.159736	-0.814351	0.0686829	-0.145659	0.832783	0.538909	-0.53323	0.204353	-2.09949	-0.621521	-0.613273	-0.745908	-0.452904	-2.74661	0.672118	0.218617	-0.353867	-0.168545	-0.335782	0.477358	-1.08345	-0.350247	-1.217	-1.0271	-1.05224	-2.37222	-1.10008	-1.60933	-0.775898	0.135473	-0.575381	-0.656277	0.136799	0.630897	-1.77967	-0.52289	0.000918655	-0.582077	-0.615791	-1.15751	-0.61982	-0.615986	-0.601189	-0.928636	-2.22515	-2.58177	-0.134803	-0.45939	-0.069676
RPS27	-1.54527	-0.688333	0.0441679	-0.546185	-0.449497	0.0719442	-0.0164089	-0.692059	-0.782348	-0.84492	-0.558411	-0.148063	0.0181636	-2.46775	0.475996	-0.212933	-0.589144	-0.355248	-0.317474	-0.458841	-0.33582	-0.603355	-0.302665	-2.16268	0.130184	-1.24984	-0.585888	0.447074	0.114428	0.0148072	0.0141046	-1.63881	-0.159773	-0.454128	-0.174893	-0.348725	-0.0410845	-0.884849	0.0282437	-1.29979	-0.950696	-0.890156	-0.597763	-0.431985	-1.09239	-0.653877	-0.396659	-0.290931	0.0512012
RPS29	0.00503681	-0.439334	0.169375	-0.869287	-0.737974	0.291038	0.0977658	-0.836701	-1.44878	-0.77138	-0.183727	-0.182676	-0.669032	-2.07559	0.711503	-0.260819	-0.774186	-0.439442	-0.549877	0.121132	-0.386496	-0.377862	-0.789365	-1.14447	-0.0796757	0.125821	-1.30987	0.0279895	0.0911592	-0.167596	-0.233067	-0.844853	-0.601467	0.265566	0.913716	-0.806388	-0.326391	-1.52335	-0.403918	-0.968071	-0.785908	-0.783882	-0.305166	-0.759951	-0.706098	-0.145269	-0.590617	-0.338937	0.313349
SAMD3	-0.474035	-0.462277	-0.483736	-0.463405	-0.52207	-0.486937	1.05525	-0.477247	-0.451667	-0.420628	-0.48466	-0.456382	-0.444693	-0.477294	-0.478193	-0.451033	-0.487339	1.49854	-0.446398	1.72157	-0.450029	-0.446758	-0.464404	-0.437165	-0.483927	3.3185	-0.476573	-0.467209	-0.486543	-0.459736	-0.464414	-0.44426	-0.467402	-0.485716	-0.519659	-0.456465	-0.457731	-0.464699	-0.458214	-0.399531	-0.436732	-0.469319	-0.405035	-0.46821	-0.500356	-0.482046	-0.453618	-0.448633	0.928056
MT-ND3	-0.269751	0.0151673	-0.0577658	-0.342144	0.183994	0.803689	0.267274	0.358758	0.511253	-0.287964	0.887545	0.548243	0.399089	0.324288	0.911788	-1.53878	0.525025	-0.517238	-0.338017	0.423018	-1.04583	0.422921	0.0666435	-2.28535	-0.915813	-0.0567505	0.0755317	0.620473	0.35912	-0.00361305	-0.279071	-1.44654	-3.65354	-1.51616	0.120888	-0.765104	-0.209597	-0.569968	-0.428087	-0.609431	-0.633293	-0.773528	-0.0190623	0.10867	-0.997893	0.363286	-2.7141	-0.11509	-0.447948
DUSP1	-0.964919	0.174461	1.15083	0.856692	0.95254	-0.920979	-0.118219	-0.952775	-1.02728	0.5445	-0.93319	-1.00924	-0.201066	-0.93944	0.291068	-0.0684998	-0.920887	-1.09282	-0.127125	-0.938422	0.363604	0.60746	-0.990545	-1.0682	-0.930538	-0.907619	-0.94635	-0.979592	0.679517	0.0537021	1.83028	0.939656	1.4014	1.29722	-0.832362	0.115789	-1.00773	-0.980709	-1.00931	-1.20384	-1.07906	-0.963938	0.332011	-0.973418	-0.88044	-0.935597	-1.0157	0.375949	-1.05408
PPP1R14B	0.881075	-0.654378	-0.55502	-0.646563	-0.385631	-0.542119	-0.729194	1.0353	0.63287	1.4228	-0.555907	0.829382	-0.740934	-0.580357	1.80096	1.22813	-0.540935	0.814152	0.515196	2.45502	-0.714246	1.10238	0.806725	-0.770961	-0.556356	-0.519692	-0.586568	0.946638	-0.541968	1.42466	-0.641743	-0.738072	1.38277	-0.552506	-0.396622	-0.680664	-0.67662	-0.6407	1.33908	1.28325	0.290429	-0.617574	-0.934214	-0.626432	1.97505	-0.564697	0.837714	0.570944	-0.741372
KLRG1	-0.362036	-0.391237	-0.405185	-0.411049	-0.370509	-0.393147	-0.361107	-0.375157	-0.369775	-0.286187	-0.367777	-0.389981	-0.34195	2.87231	-0.380478	-0.364758	-0.38841	-0.330139	-0.359404	-0.391855	-0.36001	-0.353524	-0.370833	-0.372589	-0.388974	-0.38744	-0.412437	-0.383837	-0.407429	-0.374453	-0.412787	-0.377502	-0.423706	-0.357518	-0.3702	-0.392023	-0.379478	-0.410944	-0.366219	-0.248582	-0.329695	-0.426694	-0.245056	-0.398583	-0.402459	-0.39044	-0.396499	-0.365227	-0.339725
ZFP36	-0.917375	-0.879827	-0.806601	0.5564	-0.801422	-0.825444	0.00500326	0.383671	1.17278	-0.0957586	1.5526	0.284024	-1.01964	2.79893	0.443546	0.0602052	0.653859	-0.253282	0.474586	-0.840392	0.0231961	-0.991022	0.731978	0.00296991	0.608388	1.29656	-0.805942	0.346947	0.897177	0.199153	-0.830034	-0.945575	1.97727	2.21234	-0.806996	1.16977	0.217266	1.13342	-0.940864	1.24271	-0.227631	0.842834	-1.30489	-0.852226	-0.77841	-0.841135	0.834672	0.0444816	-1.02439
HLA-C	-0.335325	-0.12253	-1.21673	-0.0847881	-2.32955	-1.23584	0.0251982	-0.160453	-0.390713	-0.550214	-0.228124	-0.449581	-0.667459	-3.13951	0.093606	-0.718711	0.615479	-0.495127	0.273408	0.282373	0.526252	-0.86509	-1.02981	-0.501942	-0.744018	-0.102503	-1.37461	-0.0375148	0.251523	-0.161649	-0.223432	0.30461	-0.232587	0.134446	-0.374889	-0.140317	-0.321189	-0.744084	0.473933	-0.750282	0.155802	0.933324	-0.694934	0.246748	-0.632656	-0.110804	0.39537	0.090274	-0.0336373
GPR183	0.450876	-0.858213	-0.753177	-0.841078	-0.601825	-0.746106	-0.946609	-0.800649	-0.91901	-1.10953	-0.771792	0.409629	1.14599	-0.764594	-0.793156	-0.924914	-0.747179	-1.0321	-0.949028	-0.773826	0.159861	-0.950984	-0.861062	0.97232	0.829906	-0.726595	-0.78099	-0.840527	1.12164	1.5603	-0.83548	-0.94763	-0.815389	-0.773287	-0.612858	-0.883879	-0.88582	-0.835321	0.283155	-1.22734	-1.0106	-0.804945	0.374786	1.64506	-0.680066	-0.769754	0.418307	0.709469	0.0156178
GZMM	-0.827939	0.502102	1.05016	0.666581	-0.560112	0.984453	-0.984904	0.643574	-0.966403	-1.0476	-0.773249	-0.962893	0.611918	-0.893774	-0.825584	-0.964167	-0.782018	-0.0867063	-0.984678	-0.823017	0.187592	-0.975677	-0.893987	0.0746711	0.876847	-0.753658	-0.872536	-0.893056	-0.808989	-0.92524	0.70159	-1.01833	-0.938825	1.28656	-0.573691	0.415757	1.35716	0.690845	-0.924356	-0.447065	0.835414	-0.931252	0.0216607	0.654926	-0.723261	-0.815014	0.397575	0.756358	-0.971567
ITGB2	0.469214	-0.910521	-0.815893	-0.886944	-0.704963	1.66327	-0.998696	-0.869673	-0.971508	-0.36092	-0.84888	-0.934001	0.584674	-0.81208	0.684384	-0.978793	-0.818646	0.75607	-1.00152	-0.83941	-0.987214	0.114336	-0.922384	0.688883	-0.83098	1.01645	-0.83587	-0.899113	-0.803108	-0.93648	-0.881439	-0.991942	-0.859508	0.590345	-0.714366	-0.931697	-0.93915	-0.882161	-0.950253	-1.28654	0.801606	1.07237	0.173693	0.701901	-0.755798	-0.83665	-0.938085	-0.987399	0.0266015
NKG7	-0.693318	1.22638	0.416941	-0.885237	0.865729	-0.743374	0.999774	-0.722571	0.602378	1.2557	1.15141	1.25924	0.286603	-0.906328	0.656929	0.775198	0.814757	1.48666	1.7659	0.314857	-0.774668	0.725596	1.47982	1.02667	-0.741334	0.88296	1.05374	-0.786345	0.478293	-0.78433	-0.886979	-0.850375	-0.91017	0.283178	-0.552189	0.0405584	0.866512	-0.880183	1.66344	1.56565	-0.728545	-0.912502	-0.579941	0.855411	-0.723448	1.01455	0.859789	1.22069	1.6003
CMC1	-0.531462	-0.598838	1.63811	1.26237	-0.376453	-0.516962	-0.623321	-0.532911	-0.614642	1.51213	1.2334	-0.617654	-0.612122	-0.588161	-0.534709	-0.612071	1.49466	-0.644437	1.33653	-0.536059	-0.611011	-0.616005	0.956351	-0.666495	-0.523248	-0.494257	-0.570277	1.08547	1.75012	-0.591666	-0.611863	0.744881	-0.611998	-0.48758	-0.384342	-0.619294	0.921121	-0.609163	-0.58908	0.604156	1.09879	-0.608305	0.636225	-0.585617	-0.480192	1.4072	0.976015	-0.620656	-0.61013
JUNB	-1.57409	-0.593057	0.9554	-1.53348	-1.35786	-1.46588	-0.52992	-0.533604	-0.170464	-1.92998	0.708067	-0.665344	-1.01626	0.562246	-0.0500107	-1.66584	-1.47243	-1.80631	-0.542067	-1.49324	-0.504538	0.667833	-0.699912	-0.938809	-1.48576	-0.2292	-1.47583	-1.56482	1.04358	0.438493	0.326955	-0.460559	0.496768	1.21568	-1.36851	-0.651504	-0.306963	0.0307992	-0.386919	0.570831	-1.78679	-0.186584	-0.57046	-1.53499	-1.39341	-1.4911	-0.235534	0.762052	-0.65867
CST7	-0.692222	-0.829356	-0.771553	-0.880928	-0.497727	-0.72252	-0.814025	-0.715152	0.267426	-0.00432959	-0.660273	0.914653	0.168925	1.09556	-0.726076	0.252675	-0.707129	0.514695	1.65884	-0.746084	1.07883	-0.792076	0.416217	0.620448	0.779418	-0.682918	-0.82493	-0.785711	-0.765193	-0.792885	1.17485	0.714255	-0.898951	-0.626099	-0.507821	0.924534	1.24306	0.585121	0.333399	0.280384	-0.769531	-0.898774	-0.0585875	1.5115	-0.688063	0.755795	2.05539	0.228146	0.975329
CXCR4	-1.17376	-0.145408	-1.13932	-1.21283	0.632249	1.01303	-0.00347484	0.40325	0.754202	0.424436	1.30049	-1.23789	-0.496658	0.489854	0.453501	-0.37372	-1.12608	-1.3255	1.19688	0.89609	-0.398907	0.992438	-1.20866	-1.30705	-1.13841	-1.10907	0.712852	-1.19871	0.338606	-1.22557	0.50803	-1.2815	1.7801	-1.13152	-1.00911	-1.23762	0.705203	0.805385	-1.23095	-0.616804	-1.30802	-1.19168	0.215078	-1.1953	-1.07927	0.101552	-1.24797	0.315113	-0.101331
ITM2C	-0.468366	-0.551652	-0.525171	-0.585874	-0.36663	-0.494867	-0.533516	-0.484998	-0.537554	-0.457481	-0.453083	-0.563731	-0.502679	-0.594804	-0.492617	-0.52974	-0.48504	0.656237	-0.531089	-0.507106	-0.523334	-0.51923	-0.508359	-0.578296	-0.494444	-0.471711	-0.556238	-0.525767	-0.52249	-0.52654	-0.586648	-0.570105	-0.599717	-0.431348	-0.371953	-0.56734	-0.540826	-0.582511	-0.514893	-0.438916	-0.499287	-0.600603	-0.418862	-0.550843	-0.479409	-0.501783	-0.582663	-0.536488	1.8938
IGHG4	-1.23622	0.696341	1.03075	0.398781	0.318885	-1.19744	-1.05499	0.56529	0.457735	-0.50795	0.50807	-1.00346	-0.233997	1.50319	0.0977343	-1.06948	-1.21937	-1.08025	0.365125	-1.16216	-1.08193	-0.15286	-0.0235302	0.010093	0.225883	-1.25516	-1.04911	0.106067	-1.13689	0.511022	-0.965384	-0.971982	0.594997	-1.33359	-1.51194	0.171567	-1.05516	-0.974781	-1.11217	-0.618213	-0.297342	-0.94222	-0.303868	-1.04865	-1.25053	0.787574	-0.95833	-1.05134	0.204233
DUSP2	-0.817669	-0.847516	1.26249	-0.829312	-0.609071	-0.742081	-0.933716	-0.795204	-0.906881	-0.466657	0.405938	0.202633	-0.955208	0.985629	1.23072	-0.912961	-0.743595	-1.01727	-0.936168	-0.768238	-0.920422	-0.938634	-0.852375	0.657739	-0.757622	0.686601	-0.772761	-0.831707	-0.734056	0.928275	0.984635	-0.932919	-0.803844	1.9707	-0.619461	-0.871524	1.34952	1.72437	-0.881643	0.863492	-0.235687	-0.793721	-0.649228	0.410818	-0.679094	-0.764568	1.0034	-0.922779	-0.956843
RPS26	-0.627536	0.120625	-1.49063	0.0135518	0.781755	-1.45948	-0.461438	-1.63208	-0.601272	-0.97215	-1.53044	-0.352139	-1.33773	-1.54668	-0.39539	-2.04401	-1.4602	-0.399969	0.422538	-0.222818	0.163368	-0.506064	0.578744	-0.896676	0.683455	-1.39032	-0.123673	0.417216	1.45562	-1.89827	0.389628	0.000468119	-1.71134	0.842983	0.6881	-0.0177051	-0.875351	-0.469941	-0.171843	-0.524879	-0.0648967	0.715558	-1.28602	0.0189922	0.528204	-0.207337	-0.367622	-1.14844	-0.229832
GZMK	-0.535871	-0.601053	-0.637124	-0.646937	-0.564165	0.634367	-0.528745	-0.566708	-0.549635	-0.351255	-0.551046	-0.597081	0.24982	-0.702483	-0.579148	-0.537952	-0.599105	-0.454643	-0.524762	-0.605882	-0.526822	-0.511271	-0.554398	-0.553479	-0.599783	-0.597726	-0.652537	-0.58489	-0.642808	-0.561892	-0.651127	-0.566099	-0.676848	-0.527584	-0.563014	-0.601804	-0.573112	-0.64693	-0.542631	-0.260705	-0.454503	-0.684086	-0.253578	-0.61907	-0.633869	-0.602821	-0.611604	-0.538595	1.5744
[truncated: 3,358 more columns]

## Sheet: Gene List for Fig. 4A
DEGs between CD161+ CTLs and CD161- counterparts
GeneID	pvalue	pct.1	pct.2	padj	FoldChange	log2FoldChange
ADSS	8.44927e-09	0.414	0.213	0.000283372	1.33056	0.412037
AGFG1	1.67965e-09	0.397	0.194	5.6332e-05	1.32377	0.404657
AHI1	2.08991e-09	0.406	0.198	7.00912e-05	1.38488	0.469757
AKAP5	6.83148e-21	0.448	0.14	2.29114e-16	1.76404	0.81888
ALOX5AP	3.53653e-13	0.753	0.483	1.18608e-08	1.48168	0.567233
ANKRD12	1.33055e-06	0.862	0.728	0.0446239	1.34133	0.423665
ANKRD28	8.42155e-09	0.305	0.128	0.000282442	1.38465	0.469522
ANP32E	9.90664e-10	0.49	0.273	3.32249e-05	1.29467	0.372583
ANXA5	1.38977e-08	0.644	0.423	0.000466102	1.4104	0.496105
ARGLU1	3.45881e-12	0.874	0.656	1.16002e-07	1.39419	0.479431
ARHGEF6	2.60588e-11	0.381	0.167	8.7396e-07	1.35487	0.438154
ARL4C	1.30957e-06	0.703	0.696	0.0439205	0.757423	-0.400828
BASP1	1.89972e-07	0.184	0.059	0.00637127	1.30745	0.386758
BCL2L11	2.61796e-07	0.222	0.087	0.00878013	1.29606	0.374134
BCL9L	3.19071e-06	0.163	0.219	0.10701	0.768384	-0.3801
BNIP3L	1.70404e-07	0.326	0.156	0.00571499	1.35558	0.438913
C1orf21	9.17434e-06	0.059	0.144	0.307689	0.764765	-0.386912
CCL4	4.12216e-06	0.678	0.814	0.138249	0.685854	-0.544028
CCR5	4.89593e-05	0.126	0.226	1	0.759715	-0.396471
CD226	2.13636e-11	0.364	0.152	7.16492e-07	1.38581	0.470726
CD28	8.03933e-07	0.142	0.241	0.0269623	0.737619	-0.439052
CD44	2.92522e-11	0.724	0.749	9.8106e-07	0.726187	-0.461587
CD63	5.11959e-13	0.828	0.579	1.71701e-08	1.43147	0.517499
CD7	3.95825e-12	0.879	0.653	1.32752e-07	1.36157	0.44527
CD81	8.50722e-09	0.665	0.696	0.000285315	0.740447	-0.433533
CD96	1.58932e-08	0.795	0.589	0.000533025	1.30528	0.384362
CDCA7	3.27836e-09	0.264	0.097	0.00010995	1.43554	0.521594
CDKN2D	3.05611e-06	0.163	0.232	0.102496	0.773407	-0.3707
CDV3	5.05852e-09	0.724	0.514	0.000169653	1.40529	0.490865
CHI3L2	4.22565e-06	0.121	0.221	0.14172	0.700006	-0.51456
CHN1	2.18008e-14	0.364	0.125	7.31154e-10	1.6097	0.68679
CKAP2	1.05555e-06	0.351	0.185	0.035401	1.30115	0.379792
CLDND1	9.95619e-11	0.46	0.606	3.33911e-06	0.630133	-0.666272
CLIC3	0.00010827	0.389	0.245	1	1.3195	0.399988
CLNK	4.12726e-14	0.255	0.061	1.3842e-09	1.50191	0.586796
CMC1	3.9381e-08	0.427	0.509	0.00132076	0.670107	-0.577537
CNOT6L	3.551e-09	0.69	0.463	0.000119093	1.32084	0.401453
CST7	1.39494e-20	0.598	0.79	4.67834e-16	0.534534	-0.903647
CTLA4	5.02681e-15	0.464	0.193	1.68589e-10	1.61792	0.694143
CTSH	4.43149e-16	0.297	0.077	1.48623e-11	1.41291	0.498674
CXCL13	3.00046e-28	0.611	0.216	1.00629e-23	2.79266	1.48164
CXCR4	8.49445e-13	0.77	0.805	2.84887e-08	0.562891	-0.829073
CXCR6	1.34467e-06	0.464	0.284	0.0450976	1.33422	0.415997
DAPK2	1.09323e-11	0.356	0.143	3.66649e-07	1.37759	0.462148
DDX39B	6.97624e-07	0.423	0.241	0.0233969	1.34892	0.431807
DEK	2.41736e-10	0.77	0.534	8.10736e-06	1.30328	0.382147
DENND2D	1.29607e-09	0.397	0.413	4.34677e-05	0.774028	-0.369542
DKK3	0.000407966	0.05	0.131	1	0.774121	-0.36937
DNAJB1	2.32927e-07	0.561	0.546	0.00781191	0.747182	-0.420469
DUSP1	4.82175e-06	0.556	0.57	0.161712	0.704924	-0.50446
DUSP16	1.92853e-10	0.347	0.147	6.4679e-06	1.35947	0.443046
DUSP2	4.41344e-10	0.552	0.626	1.48018e-05	0.550511	-0.861158
DUSP4	2.51347e-09	0.598	0.37	8.42966e-05	1.36392	0.447756
EIF2AK2	3.7371e-05	0.536	0.372	1	1.37388	0.45826
EMP3	2.39442e-06	0.494	0.556	0.0803039	0.73708	-0.440108
ENTPD1	1.99541e-13	0.364	0.133	6.69222e-09	1.5415	0.62434
EOMES	2.50947e-06	0.146	0.291	0.0841625	0.703899	-0.50656
EPSTI1	2.48641e-14	0.632	0.343	8.33891e-10	1.48353	0.569031
F2R	1.54958e-05	0.218	0.277	0.519699	0.742736	-0.429078
FABP5	3.22451e-06	0.598	0.413	0.108144	1.29894	0.377331
FAM118A	6.31862e-16	0.594	0.295	2.11914e-11	1.48111	0.566674
FAM3C	1.5678e-07	0.28	0.124	0.00525809	1.31722	0.397497
FKBP5	3.30037e-19	0.582	0.265	1.10688e-14	1.82859	0.870732
FOS	0.00528762	0.393	0.422	1	0.747083	-0.42066
FURIN	1.89696e-06	0.188	0.069	0.0636204	1.29598	0.374042
FUT8	1.24747e-08	0.351	0.166	0.000418376	1.33201	0.413603
GADD45G	8.29437e-11	0.18	0.038	2.78177e-06	1.31185	0.391606
GALNT2	2.22385e-09	0.356	0.159	7.45835e-05	1.44015	0.526216
GAPDH	9.58736e-16	0.992	0.929	3.21541e-11	1.43958	0.525649
GBP2	1.22296e-09	0.594	0.361	4.10155e-05	1.3486	0.431462
GBP5	8.08047e-08	0.531	0.327	0.00271003	1.32606	0.407145
GEM	1.15151e-06	0.188	0.068	0.0386192	1.30149	0.380169
GIMAP2	8.74344e-07	0.238	0.311	0.0293237	0.755553	-0.404394
GIMAP4	2.06199e-07	0.536	0.654	0.00691552	0.705102	-0.504097
GIMAP7	9.18529e-08	0.657	0.754	0.00308056	0.718944	-0.476048
GOLGB1	2.57045e-10	0.615	0.381	8.62077e-06	1.31829	0.398668
GOLIM4	6.23184e-14	0.305	0.093	2.09003e-09	1.40796	0.493604
GPR183	8.48384e-10	0.331	0.506	2.84531e-05	0.575618	-0.796816
GZMA	1.07558e-07	0.69	0.849	0.00360728	0.776957	-0.364093
GZMB	7.66825e-07	0.69	0.505	0.0257178	1.61456	0.691143
GZMH	0.0012311	0.494	0.541	1	0.723974	-0.465991
GZMK	7.12498e-41	0.218	0.69	2.38957e-36	0.273498	-1.8704
GZMM	5.86832e-11	0.582	0.739	1.96812e-06	0.628321	-0.670426
HAVCR2	1.01512e-11	0.385	0.162	3.40451e-07	1.48677	0.572177
HIST1H4C	1.79966e-05	0.561	0.612	0.603569	0.767938	-0.380939
HLA-C	2.19448e-10	0.987	0.991	7.35984e-06	0.712721	-0.48859
HLA-DQB1	3.83015e-08	0.707	0.499	0.00128456	1.40214	0.487626
HLA-DRB5	1.45942e-14	0.427	0.173	4.89462e-10	1.43888	0.524949
HLA-F	3.32984e-10	0.711	0.787	1.11676e-05	0.735657	-0.442896
HNRNPR	4.98375e-09	0.619	0.394	0.000167145	1.30441	0.383396
HOPX	1.52703e-06	0.268	0.128	0.0512136	1.28761	0.3647
HSPA5	1.28283e-05	0.619	0.445	0.430236	1.33416	0.415928
ID2	1.56395e-15	0.787	0.514	5.24516e-11	1.65295	0.725045
IER2	4.35386e-05	0.502	0.561	1	0.756948	-0.401734
IFI16	5.09921e-07	0.837	0.667	0.0171017	1.30559	0.384704
IFI44	6.65445e-06	0.377	0.216	0.223177	1.29947	0.377928
IFI44L	8.5043e-17	0.498	0.205	2.85217e-12	1.70396	0.768889
IFIT1	5.64784e-05	0.18	0.084	1	1.42074	0.506645
IFITM1	2.95702e-06	0.552	0.369	0.0991726	1.28728	0.364331
IFITM2	9.33152e-09	0.854	0.659	0.000312961	1.29491	0.372847
IFNG	0.00118525	0.464	0.407	1	0.721042	-0.471844
IGHA1	0.0204266	0.699	0.636	1	0.685705	-0.544339
IGHG1	8.47772e-14	0.552	0.672	2.84326e-09	0.564422	-0.825155
IGHG4	2.75513e-21	0.536	0.732	9.24017e-17	0.513613	-0.961246
IGKC	1.51266e-10	0.987	0.986	5.07315e-06	0.608407	-0.716891
IGLC2	3.07085e-05	0.866	0.864	1	0.776537	-0.364874
IKZF2	2.1329e-10	0.28	0.099	7.15332e-06	1.34631	0.429007
IKZF3	1.29896e-10	0.858	0.658	4.35645e-06	1.39082	0.475934
IRS2	3.2404e-07	0.167	0.051	0.0108676	1.38169	0.466433
ITGA1	4.47949e-05	0.548	0.385	1	1.28922	0.366498
ITGAE	1.5526e-14	0.644	0.353	5.20711e-10	1.43602	0.52208
ITGB2	1.64095e-14	0.448	0.629	5.50341e-10	0.55972	-0.837223
ITM2C	2.85307e-18	0.234	0.511	9.56863e-14	0.482947	-1.05006
IVNS1ABP	3.02268e-07	0.368	0.195	0.0101375	1.29069	0.368147
JAML	1.16025e-17	0.741	0.422	3.89126e-13	1.45318	0.539217
JUN	1.18797e-13	0.954	0.811	3.98422e-09	1.54097	0.623835
JUNB	2.55292e-07	0.782	0.815	0.00856197	0.659764	-0.599979
KAT6B	2.85579e-10	0.385	0.176	9.57776e-06	1.36361	0.447426
KLF2	3.80904e-07	0.159	0.268	0.0127748	0.661683	-0.595788
KLRB1	2.49643e-242	1	0	8.37251e-238	9.19355	3.20062
KLRG1	1.26336e-13	0.117	0.343	4.23706e-09	0.521064	-0.940468
KRT13	1.16358e-16	0.46	0.193	3.90242e-12	1.39221	0.477376
KRT86	2.0646e-08	0.155	0.037	0.000692424	1.51381	0.598181
LAYN	4.08393e-11	0.28	0.093	1.36967e-06	1.46072	0.546682
LINC00861	3.44253e-06	0.096	0.204	0.115456	0.727942	-0.458104
LINC01480	1.16468e-05	0.172	0.066	0.390612	1.2956	0.373624
LINC01871	2.59712e-20	0.782	0.45	8.71021e-16	1.82705	0.869519
LINC02446	1.75137e-09	0.368	0.168	5.87375e-05	1.55028	0.632524
LRRN3	1.88121e-06	0.197	0.074	0.0630921	1.35323	0.436407
LYAR	0.000189064	0.264	0.341	1	0.771769	-0.373759
MAST4	1.28161e-13	0.318	0.102	4.29828e-09	1.42106	0.506972
MBD2	5.19274e-13	0.623	0.357	1.74154e-08	1.33309	0.414778
MCUB	1.0476e-05	0.209	0.282	0.351346	0.760388	-0.395192
MPRIP	1.48999e-07	0.356	0.179	0.00499714	1.31674	0.396971
MT-ND3	1.37823e-13	1	0.999	4.6223e-09	0.661867	-0.595387
MT-ND6	3.36653e-10	0.577	0.342	1.12907e-05	1.32795	0.409201
MT2A	7.74427e-05	0.586	0.621	1	0.734469	-0.445226
MUC20-OT1	2.03156e-08	0.418	0.222	0.000681346	1.3345	0.416297
MX1	6.2336e-10	0.51	0.284	2.09063e-05	1.67737	0.746199
MYO7A	1.11464e-11	0.31	0.12	3.73827e-07	1.29488	0.372823
NCF1	0.000547729	0.159	0.232	1	0.774858	-0.367996
NEAT1	1.81752e-12	0.958	0.787	6.09561e-08	1.32715	0.408329
NFIL3	5.05671e-07	0.18	0.06	0.0169592	1.28449	0.361201
NFKBIA	1.66587e-05	0.623	0.454	0.558699	1.49218	0.577418
NKG7	1.1081e-08	0.824	0.908	0.000371634	0.715834	-0.482303
NPDC1	2.56432e-06	0.184	0.068	0.086002	1.29003	0.367409
NPM1	6.5354e-09	0.904	0.847	0.000219184	1.3071	0.386366
NR3C1	3.84375e-12	0.665	0.399	1.28912e-07	1.45411	0.540137
NSA2	8.58288e-06	0.69	0.526	0.287853	1.32015	0.400705
NUCKS1	3.4871e-08	0.782	0.583	0.0011695	1.34565	0.428309
ODF2L	1.73851e-10	0.49	0.255	5.83063e-06	1.47094	0.556734
PAK2	1.00346e-08	0.669	0.448	0.000336541	1.2914	0.368931
PCM1	1.44152e-09	0.665	0.431	4.83457e-05	1.33899	0.421144
PDE3B	2.72248e-13	0.531	0.277	9.13066e-09	1.30401	0.382959
PDIA6	5.04578e-09	0.611	0.384	0.000169225	1.39037	0.475465
PDLIM4	1.3494e-11	0.205	0.047	4.52563e-07	1.38496	0.469841
PHLDA1	4.40732e-08	0.305	0.135	0.00147813	1.38886	0.473905
PHTF2	4.61129e-08	0.289	0.122	0.00154653	1.36348	0.447293
PIK3IP1	2.54746e-08	0.619	0.402	0.000854368	1.3538	0.437019
PLEK	4.32395e-10	0.096	0.276	1.45017e-05	0.622913	-0.682897
PMEPA1	4.6567e-05	0.377	0.228	1	1.32672	0.407865
PPA1	4.69995e-08	0.481	0.278	0.00157627	1.33562	0.417509
PPP1R12A	5.88556e-08	0.682	0.472	0.0019739	1.32726	0.408455
PPP1R14B	1.45693e-07	0.54	0.56	0.00488626	0.67266	-0.57205
PTPN22	2.64269e-10	0.665	0.423	8.86305e-06	1.44129	0.527361
R3HDM1	1.77108e-06	0.335	0.175	0.0593986	1.29107	0.368572
RAB11FIP1	6.39058e-10	0.402	0.195	2.14327e-05	1.30775	0.387082
RAB3GAP1	1.45331e-08	0.385	0.191	0.000487411	1.34936	0.432278
RBPJ	1.61564e-26	0.766	0.406	5.41855e-22	2.08792	1.06207
RGCC	8.53226e-05	0.335	0.432	1	0.729141	-0.45573
RGS1	0.0125863	0.828	0.765	1	1.33447	0.41627
RGS16	3.07962e-10	0.192	0.047	1.03284e-05	1.44517	0.53124
RGS2	5.96249e-09	0.527	0.31	0.00019997	1.30041	0.378969
RIN3	8.63147e-14	0.351	0.133	2.89482e-09	1.34099	0.423296
RIPOR2	4.19616e-08	0.297	0.337	0.00140731	0.732769	-0.448569
RORA	2.7483e-13	0.531	0.264	9.21725e-09	1.61039	0.68741
RPL23A	7.03926e-11	0.992	0.994	2.36083e-06	0.748381	-0.418155
RPL27A	5.18987e-10	0.996	0.991	1.74058e-05	0.769466	-0.37807
RPL38	3.95357e-17	0.962	0.974	1.32595e-12	0.692699	-0.5297
RPLP2	3.19748e-09	0.996	0.997	0.000107237	0.774887	-0.367943
RPS21	3.50863e-08	0.962	0.974	0.00117672	0.739938	-0.434524
RPS26	1.68237e-18	0.862	0.88	5.64235e-14	0.620226	-0.689133
RPS27	9.94722e-10	1	0.995	3.3361e-05	0.745808	-0.423124
RPS29	4.96751e-11	1	0.995	1.666e-06	0.738632	-0.437073
RSAD2	0.000199225	0.213	0.106	1	1.36383	0.447661
S100A10	9.58185e-05	0.586	0.659	1	0.770886	-0.375411
S100A4	2.12773e-11	0.916	0.732	7.13598e-07	1.36694	0.450946
S100A7	9.78333e-09	0.377	0.199	0.000328113	1.28511	0.361893
S100A8	1.15697e-06	0.682	0.495	0.0388026	1.31809	0.398449
S100A9	4.75371e-17	0.833	0.533	1.5943e-12	1.58782	0.667047
SAMD3	4.02516e-10	0.234	0.42	1.34996e-05	0.638813	-0.646535
SAMD9	4.19006e-08	0.573	0.365	0.00140526	1.45356	0.539592
SAMD9L	1.3712e-08	0.54	0.33	0.000459874	1.308	0.387367
SCML4	3.40091e-13	0.448	0.195	1.1406e-08	1.55787	0.639574
SERBP1	5.63911e-11	0.824	0.601	1.89124e-06	1.39373	0.478952
SERPINB1	1.48263e-10	0.603	0.36	4.97246e-06	1.32076	0.401371
SH2D1A	1.20634e-05	0.377	0.459	0.404581	0.743912	-0.426797
SIGIRR	5.47823e-06	0.243	0.306	0.183729	0.775476	-0.366847
SLA	6.38945e-12	0.749	0.491	2.1429e-07	1.37412	0.458508
SLAMF7	0.00109818	0.155	0.241	1	0.759423	-0.397024
SNX9	2.41507e-08	0.331	0.152	0.000809965	1.38297	0.467767
SORL1	4.39244e-05	0.105	0.207	1	0.771567	-0.374138
SOX4	1.77679e-07	0.142	0.037	0.005959	1.65226	0.724438
SP100	2.37673e-05	0.72	0.561	0.797109	1.28903	0.366291
SPOCK2	3.81262e-13	0.736	0.463	1.27868e-08	1.45052	0.536575
SPRR2A	1.08169e-14	0.464	0.204	3.62777e-10	1.43706	0.523121
SPRR3	7.32426e-23	0.682	0.318	2.45641e-18	1.85086	0.888193
SPRY1	3.82001e-11	0.318	0.117	1.28115e-06	1.48647	0.571891
SPTAN1	1.84699e-13	0.569	0.293	6.19444e-09	1.47716	0.562822
SRGAP3	7.7046e-27	0.586	0.204	2.58397e-22	1.90778	0.931895
SRSF7	9.37206e-07	0.816	0.856	0.031432	0.760326	-0.39531
ST13	9.23007e-10	0.577	0.343	3.09558e-05	1.34453	0.427102
STAT1	3.55836e-09	0.556	0.33	0.00011934	1.43454	0.520584
TAX1BP1	9.36185e-11	0.728	0.482	3.13978e-06	1.34123	0.423553
TC2N	3.62909e-08	0.167	0.329	0.00121712	0.700707	-0.513117
THADA	5.19322e-07	0.259	0.112	0.017417	1.46985	0.555673
THRAP3	1.6329e-06	0.611	0.421	0.0547642	1.28581	0.36268
TIGIT	0.000172403	0.728	0.591	1	1.28519	0.361983
TLN1	3.07463e-13	0.766	0.495	1.03117e-08	1.42533	0.511294
TMA7	1.68924e-11	0.916	0.92	5.66538e-07	0.741295	-0.43188
TMEM14C	5.96817e-08	0.385	0.196	0.0020016	1.34422	0.426769
TMIGD2	4.20406e-17	0.293	0.07	1.40996e-12	1.53607	0.619244
TNF	0.000614225	0.084	0.14	1	0.666947	-0.584356
TNFRSF1B	1.47526e-08	0.536	0.325	0.000494774	1.31295	0.392811
TNFRSF25	3.11914e-16	0.356	0.11	1.0461e-11	1.49428	0.579447
TNFRSF9	3.58624e-10	0.347	0.149	1.20275e-05	1.51581	0.600087
TNFSF13B	5.96797e-13	0.264	0.073	2.00154e-08	1.42181	0.507727
TNFSF4	3.92568e-12	0.146	0.019	1.31659e-07	1.31583	0.395978
TNFSF9	0.000388725	0.067	0.129	1	0.732108	-0.449871
TNIP3	2.15752e-07	0.377	0.198	0.00723589	1.34138	0.423713
TPI1	4.22523e-08	0.674	0.46	0.00141706	1.36617	0.450142
TRAC	6.14643e-08	0.95	0.835	0.00206139	1.29279	0.37049
TRAF5	2.16596e-08	0.46	0.256	0.000726418	1.35016	0.433126
TSHZ2	3.8613e-10	0.226	0.068	1.295e-05	1.35254	0.435668
TTC39C	2.1581e-10	0.603	0.366	7.23782e-06	1.30082	0.379421
VDAC1	9.76066e-07	0.54	0.348	0.0327353	1.30019	0.378721
WIPF3	2.33472e-09	0.184	0.048	7.83019e-05	1.2979	0.376184
XCL1	3.2341e-12	0.322	0.114	1.08465e-07	1.48487	0.570337
YBX1	1.36717e-07	0.858	0.719	0.00458521	1.30302	0.381854
ZBED2	1.88787e-10	0.205	0.054	6.33153e-06	1.405	0.490566
ZBTB1	9.44043e-08	0.473	0.279	0.00316613	1.28821	0.365363
ZEB2	0.000138012	0.536	0.381	1	1.3398	0.422023
ZFP36L1	6.40111e-06	0.732	0.56	0.21468	1.29646	0.374573
ZNRF1	1.38071e-08	0.452	0.245	0.000463062	1.33448	0.416273

## Sheet: TCGA for Fig. S4C
HPV+ HNSCC cases from the TCGA database (n=72)
PATIENT_ID	SUBTYPE	CANCER_TYPE_ACRONYM	AGE	SEX	AJCC_PATHOLOGIC_TUMOR_STAGE	AJCC_STAGING_EDITION	PATH_M_STAGE	PATH_N_STAGE	PATH_T_STAGE	PERSON_NEOPLASM_CANCER_STATUS	PRIMARY_LYMPH_NODE_PRESENTATION_ASSESSMENT	PRIOR_DX	RADIATION_THERAPY	OS_STATUS	OS_MONTHS	DSS_STATUS	DSS_MONTHS	DFS_STATUS	DFS_MONTHS	Hugo_Symbol	KLRB1	CLEC2D	CD8A	CD8B
TCGA-BA-5153	HNSC_HPV+	HNSC	51	Male		6TH		NX	T2	With Tumor	No	No	Yes	1:DECEASED	57.9281	1:DEAD WITH TUMOR	57.9281	1:Recurred/Progressed	50.0378	TCGA-BA-5153	113.909	475.406	1063.78	163.333
TCGA-BA-5559	HNSC_HPV+	HNSC	71	Male		6TH		NX	TX	With Tumor	Yes	Yes	No	1:DECEASED	68.4814	1:DEAD WITH TUMOR	68.4814			TCGA-BA-5559	132.599	1063.9	1954.5	365.567
TCGA-BA-6869	HNSC_HPV+	HNSC	62	Male	STAGE III	7TH		N0	T3	Tumor Free	Yes	No	Yes	0:LIVING	21.1724	0:ALIVE OR DEAD TUMOR FREE	21.1724	0:DiseaseFree	21.1724	TCGA-BA-6869	26.9718	619.125	117.287	27.7891
TCGA-BA-A4IF	HNSC_HPV+	HNSC	59	Male		7TH	MX	NX	TX	Tumor Free	No	No	Yes	0:LIVING	29.4243	0:ALIVE OR DEAD TUMOR FREE	29.4243			TCGA-BA-A4IF	7.0159	1000.47	22.4509	2.3386
TCGA-BA-A4IG	HNSC_HPV+	HNSC	77	Male		7TH	MX	NX	T1	Tumor Free	Yes	Yes	Yes	0:LIVING	28.1093	0:ALIVE OR DEAD TUMOR FREE	28.1093			TCGA-BA-A4IG	58.4525	766.19	190.917	35.3238
TCGA-BA-A4IH	HNSC_HPV+	HNSC	57	Male	STAGE IVA	7TH	M0	N1	T2	Tumor Free	Yes	No	Yes	0:LIVING	20.4491	0:ALIVE OR DEAD TUMOR FREE	20.4491			TCGA-BA-A4IH	30.4847	1122.36	424.927	287.374
TCGA-BB-4223	HNSC_HPV+	HNSC	48	Male	STAGE IVA	7TH	M0	N2B	T2	Tumor Free		No	Yes	0:LIVING	105.895	0:ALIVE OR DEAD TUMOR FREE	105.895			TCGA-BB-4223	73.663	1242.18	1195.76	282.543
TCGA-BB-4225	HNSC_HPV+	HNSC	73	Male		7TH		NX	TX	With Tumor		No	Yes	0:LIVING	4.79995	0:ALIVE OR DEAD TUMOR FREE	4.79995			TCGA-BB-4225	42.6714	740.834	938.055	530.345
TCGA-BB-4228	HNSC_HPV+	HNSC	50	Male	STAGE III	7TH		NX	T3	Tumor Free		No	Yes	0:LIVING	18.3779	0:ALIVE OR DEAD TUMOR FREE	18.3779	0:DiseaseFree	18.3779	TCGA-BB-4228	36.8772	1014.52	215.379	739.898
TCGA-BB-A6UM	HNSC_HPV+	HNSC	52	Male	STAGE III	7TH	MX	N2	T1	Tumor Free	No	No	Yes	0:LIVING	12.9204	0:ALIVE OR DEAD TUMOR FREE	12.9204	0:DiseaseFree	12.9204	TCGA-BB-A6UM	25.7177	824.804	633.39	239.175
TCGA-CN-4741	HNSC_HPV+	HNSC	75	Male	STAGE IVA	6TH	M0	N0	T4A	Tumor Free	Yes	No	Yes	0:LIVING	73.6102	0:ALIVE OR DEAD TUMOR FREE	73.6102			TCGA-CN-4741	23.8745	474.079	146.658	84.925
TCGA-CN-5374	HNSC_HPV+	HNSC	56	Female	STAGE IVA	6TH	M0	N2	T2	Tumor Free	Yes	No	Yes	1:DECEASED	56.9418	0:ALIVE OR DEAD TUMOR FREE	56.9418			TCGA-CN-5374	151.545	1023.54	587.543	177.538
TCGA-CN-A499	HNSC_HPV+	HNSC	60	Female	STAGE II	7TH	MX	N0	T2	Tumor Free	Yes	No	No	0:LIVING	23.5723	0:ALIVE OR DEAD TUMOR FREE	23.5723	0:DiseaseFree	23.5723	TCGA-CN-A499	22.344	1107.08	690.557	140.388
TCGA-CN-A49A	HNSC_HPV+	HNSC	60	Male	STAGE IVB	7TH	MX	N0	T4B	With Tumor	Yes	No	Yes	1:DECEASED	17.293	1:DEAD WITH TUMOR	17.293			TCGA-CN-A49A	5.5536	666.898	20.3633	11.5701
TCGA-CN-A49B	HNSC_HPV+	HNSC	71	Male	STAGE III	7TH	MX	N1	T3	Tumor Free	Yes	No	Yes	0:LIVING	29.7202	0:ALIVE OR DEAD TUMOR FREE	29.7202	0:DiseaseFree	29.7202	TCGA-CN-A49B	35.7197	917.722	427.263	79.6825
TCGA-CN-A49C	HNSC_HPV+	HNSC	67	Male		7TH	MX	NX	TX	Tumor Free	No	No	Yes	0:LIVING	21.2052	0:ALIVE OR DEAD TUMOR FREE	21.2052			TCGA-CN-A49C	21.8604	616.19	125.697	26.4147
TCGA-CN-A6UY	HNSC_HPV+	HNSC	57	Male	STAGE IVA	7TH	MX	N2B	T3	Tumor Free	Yes	No	Yes	0:LIVING	23.4408	0:ALIVE OR DEAD TUMOR FREE	23.4408			TCGA-CN-A6UY	73.3186	1721.61	906.836	974.642
TCGA-CN-A6V1	HNSC_HPV+	HNSC	59	Male	STAGE IVA	7TH	MX	N2A	T2	Tumor Free	Yes	Yes, History Of Synchronous And Or Bilateral Malignancy	No	0:LIVING	19.8244	0:ALIVE OR DEAD TUMOR FREE	19.8244			TCGA-CN-A6V1	424.199	2211.25	1584.88	655.853
TCGA-CN-A6V6	HNSC_HPV+	HNSC	59	Male	STAGE IVA	7TH	MX	N2B	T2	Tumor Free	Yes	No	Yes	0:LIVING	20.8765	0:ALIVE OR DEAD TUMOR FREE	20.8765			TCGA-CN-A6V6	164.139	1120.23	1502.16	340.412
TCGA-CN-A6V7	HNSC_HPV+	HNSC	40	Male	STAGE IVA	7TH	MX	N2B	T2	Tumor Free	Yes	No	Yes	0:LIVING	19.5286	0:ALIVE OR DEAD TUMOR FREE	19.5286			TCGA-CN-A6V7	45.3741	994.713	262.044	35.5255
TCGA-CQ-5323	HNSC_HPV+	HNSC	82	Male	STAGE I	6TH		N0	T1	Tumor Free	Yes	Yes	Yes	0:LIVING	48.1967	0:ALIVE OR DEAD TUMOR FREE	48.1967	0:DiseaseFree	48.1967	TCGA-CQ-5323	26.9803	613.951	293.785	48.5645
TCGA-CR-5243	HNSC_HPV+	HNSC	51	Male		6TH		NX	TX	Tumor Free	No	No	Yes	0:LIVING	84.2292	0:ALIVE OR DEAD TUMOR FREE	84.2292			TCGA-CR-5243	53.1092	645.714	395.63	385.546
TCGA-CR-5248	HNSC_HPV+	HNSC	53	Male		6TH		NX	TX	With Tumor		No	Yes	0:LIVING	54.6734	0:ALIVE OR DEAD TUMOR FREE	54.6734			TCGA-CR-5248	220.811	1234.98	1101.61	387.885
TCGA-CR-5249	HNSC_HPV+	HNSC	35	Female	STAGE II	6TH	M0	N0	T2	Tumor Free	No	No	Yes	0:LIVING	37.8736	0:ALIVE OR DEAD TUMOR FREE	37.8736	0:DiseaseFree	37.8736	TCGA-CR-5249	162.574	693.824	598.214	195.312
TCGA-CR-5250	HNSC_HPV+	HNSC	71	Male		6TH		NX	TX	Tumor Free		No	Yes	0:LIVING	26.2682	0:ALIVE OR DEAD TUMOR FREE	26.2682	0:DiseaseFree	26.2682	TCGA-CR-5250	90.758	638.045	160.783	401.761
TCGA-CR-6467	HNSC_HPV+	HNSC	59	Male	STAGE III	6TH	M0	N1	T2	Tumor Free	Yes	No	Yes	0:LIVING	58.4213	0:ALIVE OR DEAD TUMOR FREE	58.4213			TCGA-CR-6467	140.105	1375.36	1785.61	290.009
TCGA-CR-6470	HNSC_HPV+	HNSC	38	Male	STAGE II	6TH	M0	N0	T2	Tumor Free	Yes	No	Yes	0:LIVING	50.0049	0:ALIVE OR DEAD TUMOR FREE	50.0049			TCGA-CR-6470	158.479	925.751	1234.95	399.706
TCGA-CR-6471	HNSC_HPV+	HNSC	58	Male	STAGE IVA	6TH	M0	N1	T4A	With Tumor	Yes	No	Yes	1:DECEASED	39.5174	1:DEAD WITH TUMOR	39.5174			TCGA-CR-6471	54.2969	623.438	861.328	199.609
TCGA-CR-6472	HNSC_HPV+	HNSC	59	Male		6TH				Tumor Free		Yes	Yes	0:LIVING	34.5202	0:ALIVE OR DEAD TUMOR FREE	34.5202			TCGA-CR-6472	30.03	782.282	106.607	30.5305
TCGA-CR-6473	HNSC_HPV+	HNSC	68	Male		6TH				Tumor Free		No	Yes	0:LIVING	36.9859	0:ALIVE OR DEAD TUMOR FREE	36.9859			TCGA-CR-6473	26.0305	1313.85	114.169	21.4637
TCGA-CR-6480	HNSC_HPV+	HNSC	53	Male		7TH				Tumor Free		No		0:LIVING	11.9012	0:ALIVE OR DEAD TUMOR FREE	11.9012			TCGA-CR-6480	48.153	438.325	218.997	55.0792
TCGA-CR-6481	HNSC_HPV+	HNSC	47	Male		7TH				Tumor Free		No		0:LIVING	10.2245	0:ALIVE OR DEAD TUMOR FREE	10.2245			TCGA-CR-6481	197.117	1083.62	1534.67	317.327
TCGA-CR-6482	HNSC_HPV+	HNSC	62	Male		7TH				Tumor Free		No		0:LIVING	11.3423	0:ALIVE OR DEAD TUMOR FREE	11.3423			TCGA-CR-6482	256.457	960.49	550.893	155.998
TCGA-CR-6487	HNSC_HPV+	HNSC	50	Male	STAGE I	7TH	M0	N0	T1	Tumor Free		No	No	0:LIVING	7.69307	0:ALIVE OR DEAD TUMOR FREE	7.69307	0:DiseaseFree	7.69307	TCGA-CR-6487	399.507	1486.45	2924.67	696.586
TCGA-CR-7368	HNSC_HPV+	HNSC	54	Male	STAGE IVA	6TH	M0	N1	T4A	Tumor Free	Yes	No	Yes	0:LIVING	40.9311	0:ALIVE OR DEAD TUMOR FREE	40.9311			TCGA-CR-7368	44.7322	340.789	204.532	50.9123
TCGA-CR-7369	HNSC_HPV+	HNSC	59	Male	STAGE IVA	6TH	M0	N2B	T4A	Tumor Free	Yes	No	No	1:DECEASED	35.8352	0:ALIVE OR DEAD TUMOR FREE	35.8352			TCGA-CR-7369	28.4466	345.129	195.699	38.3857
TCGA-CR-7385	HNSC_HPV+	HNSC	42	Male		6TH	M0	NX	T1	Tumor Free	No	No	Yes	0:LIVING	32.7777	0:ALIVE OR DEAD TUMOR FREE	32.7777			TCGA-CR-7385	98.3775	788.386	550.64	107.942
TCGA-CR-7404	HNSC_HPV+	HNSC	53	Male		6TH		NX	TX	With Tumor	No	No	Yes	0:LIVING	48.394	0:ALIVE OR DEAD TUMOR FREE	48.394			TCGA-CR-7404	57.916	507.002	453.2	116.148
TCGA-CV-5442	HNSC_HPV+	HNSC	76	Female	STAGE IVA	7TH		N2B	T4A	Tumor Free	Yes	No	No	0:LIVING	76.5033	0:ALIVE OR DEAD TUMOR FREE	76.5033			TCGA-CV-5442	9.9529	398.638	34.5731	7.8575
TCGA-CV-5443	HNSC_HPV+	HNSC	63	Male	STAGE III	7TH		N0	T3	Tumor Free	Yes	No	No	0:LIVING	91.5278	0:ALIVE OR DEAD TUMOR FREE	91.5278			TCGA-CV-5443	65.6656	824.074	690.376	239.591
TCGA-CV-5970	HNSC_HPV+	HNSC	59	Male	STAGE IVA	7TH		N2B	T4A	With Tumor	Yes	No		1:DECEASED	13.3478	1:DEAD WITH TUMOR	13.3478			TCGA-CV-5970	9.5585	426.108	78.9834	18.6139
TCGA-CV-5971	HNSC_HPV+	HNSC	60	Male	STAGE IVA	7TH		N2A	T4A	Tumor Free	Yes	No	No	0:LIVING	23.0463	0:ALIVE OR DEAD TUMOR FREE	23.0463			TCGA-CV-5971	93.9052	465.192	318.194	79.8194
TCGA-CV-6433	HNSC_HPV+	HNSC	57	Male	STAGE II	7TH		N0	T2	Tumor Free	Yes	No	Yes	0:LIVING	21.0737	0:ALIVE OR DEAD TUMOR FREE	21.0737	0:DiseaseFree	21.0737	TCGA-CV-6433	106.65	1244.11	3224.93	374.505
TCGA-CV-6939	HNSC_HPV+	HNSC	60	Male	STAGE IVA	7TH		N2B	T4A	With Tumor	Yes	No		1:DECEASED	21.8957	1:DEAD WITH TUMOR	21.8957			TCGA-CV-6939	43.2058	772.427	437.995	89.0501
TCGA-CV-6961	HNSC_HPV+	HNSC	61	Male	STAGE II	7TH		N0	T2		No	No	No	1:DECEASED	2.4986	1:DEAD WITH TUMOR	2.4986			TCGA-CV-6961	8.4099	626.974	125.859	86.4192
TCGA-CV-7100	HNSC_HPV+	HNSC	66	Male	STAGE III	7TH		N1	T2	With Tumor	No	No		1:DECEASED	9.00812	1:DEAD WITH TUMOR	9.00812			TCGA-CV-7100	31.6785	944.208	408.511	75.1773
TCGA-CV-7406	HNSC_HPV+	HNSC	49	Male	STAGE II	7TH		N0	T2		Yes	No		1:DECEASED	57.4679		57.4679			TCGA-CV-7406	5.9741	562.562	25.224	7.6336
TCGA-DQ-7591	HNSC_HPV+	HNSC	62	Male		7TH		NX	TX	Tumor Free		No	Yes	0:LIVING	20.4491	0:ALIVE OR DEAD TUMOR FREE	20.4491			TCGA-DQ-7591	99.9929	1222.25	864.913	218.259
TCGA-DQ-7593	HNSC_HPV+	HNSC	58	Male		7TH		NX	TX	Tumor Free	No	Yes	Yes	0:LIVING	40.2407	0:ALIVE OR DEAD TUMOR FREE	40.2407			TCGA-DQ-7593	412.574	1687.87	889.509	406.25
TCGA-DQ-7596	HNSC_HPV+	HNSC	48	Male		7TH				Tumor Free		No	Yes	0:LIVING	41.5886	0:ALIVE OR DEAD TUMOR FREE	41.5886			TCGA-DQ-7596	108.982	997.006	358.084	115.868
TCGA-H7-A76A	HNSC_HPV+	HNSC	57	Male		7TH	MX	N2B	TX	Tumor Free	Yes	No	Yes	0:LIVING	20.9422	0:ALIVE OR DEAD TUMOR FREE	20.9422			TCGA-H7-A76A	275.951	1153.45	565.442	283.043
TCGA-HD-7754	HNSC_HPV+	HNSC	69	Male	STAGE IVA	7TH		N2B	T2	With Tumor	Yes	No	Yes	0:LIVING	25.7422	0:ALIVE OR DEAD TUMOR FREE	25.7422			TCGA-HD-7754	7.0116	344.916	65.2617	15.3716
TCGA-HD-7832	HNSC_HPV+	HNSC	52	Male	STAGE IVA	7TH		N0	T4A	Tumor Free	Yes	No	Yes	0:LIVING	27.4846	0:ALIVE OR DEAD TUMOR FREE	27.4846			TCGA-HD-7832	6.3136	1142.06	156.086	29.1126
TCGA-HD-8314	HNSC_HPV+	HNSC	58	Male	STAGE III	7TH		N1	T1	Tumor Free	Yes	No	Yes	0:LIVING	22.0272	0:ALIVE OR DEAD TUMOR FREE	22.0272	0:DiseaseFree	22.0272	TCGA-HD-8314	26.1055	487.48	230.155	57.0059
TCGA-HD-A633	HNSC_HPV+	HNSC	74	Male	STAGE IVA	7TH	MX	N0	T4A	Tumor Free	Yes	No	Yes	0:LIVING	13.8409	0:ALIVE OR DEAD TUMOR FREE	13.8409			TCGA-HD-A633	8.3807	1287.04	13.9679	3.9908
TCGA-HD-A634	HNSC_HPV+	HNSC	56	Male	STAGE IVA	7TH	MX	N2B	T3	Tumor Free	Yes	No		1:DECEASED	4.27393	1:DEAD WITH TUMOR	4.27393			TCGA-HD-A634	0.5128	1903.59	12.8205	6.6667
TCGA-IQ-A61I	HNSC_HPV+	HNSC	63	Male	STAGE IVA	7TH	M0	N2B	T1	Tumor Free	Yes	No	No	1:DECEASED	0.0657527	0:ALIVE OR DEAD TUMOR FREE	0.0657527			TCGA-IQ-A61I	50.7048	1339.74	255.273	67.7522
TCGA-KU-A6H7	HNSC_HPV+	HNSC	55	Female	STAGE IVA	7TH	M0	N2A	T2	Tumor Free	Yes	No	Yes	0:LIVING	19.2655	0:ALIVE OR DEAD TUMOR FREE	19.2655			TCGA-KU-A6H7	69.6709	1180.35	1387.34	404.253
TCGA-MZ-A5BI	HNSC_HPV+	HNSC	53	Male		6TH					No	No	No	1:DECEASED	7.13417		7.13417			TCGA-MZ-A5BI	83.9053	1319.36	604.548	162.432
TCGA-MZ-A6I9	HNSC_HPV+	HNSC	68	Male		7TH				With Tumor	No	No	No	1:DECEASED	16.0765	1:DEAD WITH TUMOR	16.0765			TCGA-MZ-A6I9	45.9046	552.673	101.354	23.634
TCGA-P3-A5Q5	HNSC_HPV+	HNSC	54	Male	STAGE IVA	6TH	MX	N2	T2	Tumor Free	Yes	No	Yes	0:LIVING	29.9175	0:ALIVE OR DEAD TUMOR FREE	29.9175			TCGA-P3-A5Q5	272.687	1437.09	1766.77	585.708
TCGA-P3-A5QE	HNSC_HPV+	HNSC	49	Male	STAGE III	6TH	MX	N1	T2	Tumor Free	Yes	No	Yes	0:LIVING	51.2542	0:ALIVE OR DEAD TUMOR FREE	51.2542	0:DiseaseFree	51.2542	TCGA-P3-A5QE	78.2259	1469.45	829.793	981.005
TCGA-P3-A5QF	HNSC_HPV+	HNSC	49	Male	STAGE IVA	6TH	MX	N2B	T4	With Tumor	Yes	No	Yes	1:DECEASED	10.8492	1:DEAD WITH TUMOR	10.8492			TCGA-P3-A5QF	13.5198	744.522	87.6457	21.9114
TCGA-P3-A6SW	HNSC_HPV+	HNSC	50	Male	STAGE IVB	6TH	MX	N3	T3	Tumor Free	Yes	No	Yes	0:LIVING	36.8215	0:ALIVE OR DEAD TUMOR FREE	36.8215			TCGA-P3-A6SW	80.7385	1077.77	695.353	149.585
TCGA-P3-A6T6	HNSC_HPV+	HNSC	53	Male	STAGE IVA	6TH	MX	NX	T4A	With Tumor	No	No	Yes	1:DECEASED	12.9862	1:DEAD WITH TUMOR	12.9862			TCGA-P3-A6T6	5.6974	1022.28	30.115	13.8366
TCGA-QK-A6IF	HNSC_HPV+	HNSC	61	Male		7TH				Tumor Free		No	Yes	0:LIVING	23.145	0:ALIVE OR DEAD TUMOR FREE	23.145			TCGA-QK-A6IF	155.971	2161.49	614.135	156.621
TCGA-QK-A6V9	HNSC_HPV+	HNSC	56	Male	STAGE II	7TH	M0	NX	T2	Tumor Free	No	No	No	0:LIVING	27.386	0:ALIVE OR DEAD TUMOR FREE	27.386	0:DiseaseFree	27.386	TCGA-QK-A6V9	61.0716	1145.37	734.357	139.378
TCGA-RS-A6TP	HNSC_HPV+	HNSC	58	Male	STAGE II	7TH	M0	N0	T2	Tumor Free	No	No	No	0:LIVING	16.9642	0:ALIVE OR DEAD TUMOR FREE	16.9642	0:DiseaseFree	16.9642	TCGA-RS-A6TP	3.8249	466.936	127.106	46.7819
TCGA-T2-A6X0	HNSC_HPV+	HNSC	49	Male		7TH			TX	Tumor Free	Yes	No	Yes	0:LIVING	7.10129	0:ALIVE OR DEAD TUMOR FREE	7.10129			TCGA-T2-A6X0	71.535	915.523	560.985	149.972
TCGA-TN-A7HI	HNSC_HPV+	HNSC	56	Male	STAGE IVA	7TH	M0	N2B	T2	Tumor Free	Yes	No	Yes	0:LIVING	13.5451	0:ALIVE OR DEAD TUMOR FREE	13.5451			TCGA-TN-A7HI	136.109	1009.79	505.812	238.192
TCGA-TN-A7HL	HNSC_HPV+	HNSC	59	Male	STAGE IVA	7TH	M0	N2B	T3	Tumor Free	Yes	No	Yes	0:LIVING	20.3505	0:ALIVE OR DEAD TUMOR FREE	20.3505			TCGA-TN-A7HL	220.834	1524.93	1569.81	635.471
TCGA-UP-A6WW	HNSC_HPV+	HNSC	58	Male		7TH				Tumor Free	Yes	No	Yes	0:LIVING	17.03	0:ALIVE OR DEAD TUMOR FREE	17.03			TCGA-UP-A6WW	22.656	1143.26	122.691	960.962

## Sheet: GSE159067 for Fig. S4D
HNSCCs with known HPV status from GSE159067 (n=60)
Sample_title	Sample_source_name	Sample_characteristics_site	Sample_characteristics_age	Sample_characteristics_sex	Sample_characteristics_tobacco	Sample_characteristics_alcohol	Sample_characteristics_line	Sample_characteristics_response	Sample_characteristics_OS	Sample_characteristics_OS event	Sample_characteristics_PFS	Sample_characteristics_PFS event	Sample_hot phenotype	Sample_hot score	KLRB1 expression	CD8A expression	HPV
Targeted RNA of patient number 1	Oral cavity	site: Oral cavity	age: 55	Sex: F	tobacco status: 1	alcohol status: 1	immunotherapy line: 1	best response on immunotherapy (recist): PD	os (month): 0.3	os (event): 1	pfs (month): 0.3	pfs (event): 1	hot phenotype: -0.215190295782389	hot score: COLD	2.22209	5.98459	0
Targeted RNA of patient number 5	Oral cavity	site: Oral cavity	age: 68	Sex: M	tobacco status: 1	alcohol status: 0	immunotherapy line: 3	best response on immunotherapy (recist): SD	os (month): 25.7	os (event): 1	pfs (month): 7	pfs (event): 1	hot phenotype: 0.132024347938217	hot score: HOT	4.04024	6.55656	0
Targeted RNA of patient number 8	Oropharynx	site: Oropharynx	age: 52	Sex: M	tobacco status: 1	alcohol status: 1	immunotherapy line: 5	best response on immunotherapy (recist): PR	os (month): 20.8	os (event): 1	pfs (month): 10.2	pfs (event): 1	hot phenotype: 0.0668948594768994	hot score: HOT	5.15055	7.37537	0
Targeted RNA of patient number 10	Oropharynx	site: Oropharynx	age: 64	Sex: F	tobacco status: 1	alcohol status: 1	immunotherapy line: 2	best response on immunotherapy (recist): PD	os (month): 11.3	os (event): 1	pfs (month): 2.2	pfs (event): 1	hot phenotype: -0.188660628013449	hot score: COLD	2.83466	5.25839	0
Targeted RNA of patient number 11	Oral cavity	site: Oral cavity	age: 68	Sex: M	tobacco status: 0	alcohol status: 0	immunotherapy line: 2	best response on immunotherapy (recist): PD	os (month): 0.6	os (event): 1	pfs (month): 0.6	pfs (event): 1	hot phenotype: -0.0711795150282511	hot score: COLD	3.36078	6.06039	0
Targeted RNA of patient number 15	Oral cavity	site: Oral cavity	age: 68	Sex: M	tobacco status: 1	alcohol status: 1	immunotherapy line: 2	best response on immunotherapy (recist): PD	os (month): 16.4	os (event): 1	pfs (month): 12.6	pfs (event): 1	hot phenotype: -0.360122315270266	hot score: COLD	3.06717	5.32568	0
Targeted RNA of patient number 17	Oropharynx	site: Oropharynx	age: 58	Sex: M	tobacco status: 1	alcohol status: 1	immunotherapy line: 2	best response on immunotherapy (recist): PD	os (month): 18.7	os (event): 1	pfs (month): 1.8	pfs (event): 1	hot phenotype: -0.116713457091998	hot score: COLD	3.29471	6.96691	1
Targeted RNA of patient number 18	Oral cavity	site: Oral cavity	age: 64	Sex: M	tobacco status: 0	alcohol status: 0	immunotherapy line: 1	best response on immunotherapy (recist): SD	os (month): 11.7	os (event): 1	pfs (month): 1.6	pfs (event): 1	hot phenotype: -0.12920920114414	hot score: COLD	1.47988	5.43267	1
Targeted RNA of patient number 19	Larynx	site: Larynx	age: 54	Sex: M	tobacco status: 1	alcohol status: 1	immunotherapy line: 1	best response on immunotherapy (recist): SD	os (month): 18.2	os (event): 1	pfs (month): 3.7	pfs (event): 1	hot phenotype: 0.0109314764772341	hot score: HOT	2.2865	6.11282	0
Targeted RNA of patient number 20	Hypopharynx	site: Hypopharynx	age: 52	Sex: M	tobacco status: 1	alcohol status: 1	immunotherapy line: 2	best response on immunotherapy (recist): PD	os (month): 1.8	os (event): 1	pfs (month): 1.7	pfs (event): 1	hot phenotype: -0.0492131798464883	hot score: COLD	3.12237	6.46073	0
Targeted RNA of patient number 21	Oral cavity	site: Oral cavity	age: 65	Sex: M	tobacco status: 1	alcohol status: 1	immunotherapy line: 4	best response on immunotherapy (recist): PD	os (month): 1.9	os (event): 1	pfs (month): 1.9	pfs (event): 1	hot phenotype: 0.109988699905263	hot score: HOT	3.59762	5.42796	0
Targeted RNA of patient number 22	Oral cavity	site: Oral cavity	age: 71	Sex: F	tobacco status: 0	alcohol status: 0	immunotherapy line: 2	best response on immunotherapy (recist): PR	os (month): 43.6	os (event): 0	pfs (month): 3.6	pfs (event): 1	hot phenotype: -0.0054326042599403	hot score: COLD	1.09345	5.64403	0
Targeted RNA of patient number 23	Oropharynx	site: Oropharynx	age: 63	Sex: M	tobacco status: 1	alcohol status: 1	immunotherapy line: 2	best response on immunotherapy (recist): PD	os (month): 1	os (event): 1	pfs (month): 1	pfs (event): 1	hot phenotype: -0.443040971984016	hot score: COLD	-0.0153858	5.12022	0
Targeted RNA of patient number 24	Oropharynx	site: Oropharynx	age: 60	Sex: M	tobacco status: 1	alcohol status: 1	immunotherapy line: 2	best response on immunotherapy (recist): PD	os (month): 2.8	os (event): 1	pfs (month): 1.8	pfs (event): 1	hot phenotype: 0.21632937835799	hot score: HOT	5.22729	8.00671	0
Targeted RNA of patient number 25	Oropharynx	site: Oropharynx	age: 59	Sex: M	tobacco status: 1	alcohol status: 1	immunotherapy line: 3	best response on immunotherapy (recist): PD	os (month): 1.7	os (event): 1	pfs (month): 1.7	pfs (event): 1	hot phenotype: -0.696245998738575	hot score: COLD	1.56172	4.44004	0
Targeted RNA of patient number 26	Oropharynx	site: Oropharynx	age: 65	Sex: M	tobacco status: 0	alcohol status: 1	immunotherapy line: 2	best response on immunotherapy (recist): PD	os (month): 3.4	os (event): 1	pfs (month): 1.8	pfs (event): 1	hot phenotype: 0.359998501395567	hot score: HOT	5.92926	9.64383	0
Targeted RNA of patient number 27	Oral cavity	site: Oral cavity	age: 64	Sex: M	tobacco status: 1	alcohol status: 1	immunotherapy line: 2	best response on immunotherapy (recist): PD	os (month): 8.2	os (event): 1	pfs (month): 1.8	pfs (event): 1	hot phenotype: 0.316490604086157	hot score: HOT	4.31329	6.68628	0
Targeted RNA of patient number 28	Oropharynx	site: Oropharynx	age: 67	Sex: M	tobacco status: 1	alcohol status: 1	immunotherapy line: 1	best response on immunotherapy (recist): PD	os (month): 1.2	os (event): 1	pfs (month): 1.2	pfs (event): 1	hot phenotype: -0.243816207066637	hot score: COLD	1.59184	5.6014	0
Targeted RNA of patient number 29	Oral cavity	site: Oral cavity	age: 43	Sex: M	tobacco status: 1	alcohol status: 1	immunotherapy line: 1	best response on immunotherapy (recist): PD	os (month): 0.6	os (event): 1	pfs (month): 0.6	pfs (event): 1	hot phenotype: 0.386754447949989	hot score: HOT	1.76962	6.76765	1
Targeted RNA of patient number 30	Oral cavity	site: Oral cavity	age: 55	Sex: F	tobacco status: 1	alcohol status: 0	immunotherapy line: 2	best response on immunotherapy (recist): SD	os (month): 14	os (event): 1	pfs (month): 5.4	pfs (event): 1	hot phenotype: 0.264641573139731	hot score: HOT	1.63673	7.93453	0
Targeted RNA of patient number 32	Oropharynx	site: Oropharynx	age: 61	Sex: M	tobacco status: 1	alcohol status: 1	immunotherapy line: 2	best response on immunotherapy (recist): PD	os (month): 19.5	os (event): 1	pfs (month): 4	pfs (event): 1	hot phenotype: 0.114840315434105	hot score: HOT	4.40804	6.69367	0
Targeted RNA of patient number 33	Sinus maxillaire	site: Sinus maxillaire	age: 69	Sex: M	tobacco status: 1	alcohol status: 1	immunotherapy line: 2	best response on immunotherapy (recist): PD	os (month): 7.8	os (event): 1	pfs (month): 1.8	pfs (event): 1	hot phenotype: 0.578636588391257	hot score: HOT	3.29491	6.04215	0
Targeted RNA of patient number 34	Oral cavity	site: Oral cavity	age: 33	Sex: F	tobacco status: 1	alcohol status: 1	immunotherapy line: 2	best response on immunotherapy (recist): PD	os (month): 0.6	os (event): 1	pfs (month): 0.6	pfs (event): 1	hot phenotype: -0.270303687826732	hot score: COLD	1.56628	5.49805	0
Targeted RNA of patient number 36	Hypopharynx	site: Hypopharynx	age: 71	Sex: M	tobacco status: 1	alcohol status: 1	immunotherapy line: 1	best response on immunotherapy (recist): SD	os (month): 25.8	os (event): 1	pfs (month): 21	pfs (event): 1	hot phenotype: 0.0776446289663417	hot score: HOT	4.53806	6.98996	0
Targeted RNA of patient number 37	Hypopharynx	site: Hypopharynx	age: 51	Sex: F	tobacco status: 1	alcohol status: 1	immunotherapy line: 1	best response on immunotherapy (recist): PD	os (month): 1.3	os (event): 1	pfs (month): 1.3	pfs (event): 1	hot phenotype: -0.430881827679836	hot score: COLD	1.75897	6.45435	0
Targeted RNA of patient number 40	Oropharynx	site: Oropharynx	age: 52	Sex: F	tobacco status: 1	alcohol status: 1	immunotherapy line: 1	best response on immunotherapy (recist): PD	os (month): 36.3	os (event): 1	pfs (month): 1.1	pfs (event): 1	hot phenotype: 0.68280687256204	hot score: HOT	5.28324	8.13095	1
Targeted RNA of patient number 41	Hypopharynx	site: Hypopharynx	age: 74	Sex: M	tobacco status: 1	alcohol status: 1	immunotherapy line: 1	best response on immunotherapy (recist): SD	os (month): 14.6	os (event): 1	pfs (month): 2.6	pfs (event): 1	hot phenotype: 0.082717322079865	hot score: HOT	4.17204	6.99415	0
Targeted RNA of patient number 42	Oropharynx	site: Oropharynx	age: 54	Sex: F	tobacco status: 1	alcohol status: 1	immunotherapy line: 1	best response on immunotherapy (recist): SD	os (month): 27.4	os (event): 1	pfs (month): 8.2	pfs (event): 1	hot phenotype: 0.110189573459715	hot score: HOT	2.46409	5.66146	0
Targeted RNA of patient number 47	Oral cavity	site: Oral cavity	age: 61	Sex: M	tobacco status: 1	alcohol status: 1	immunotherapy line: 4	best response on immunotherapy (recist): PD	os (month): 0.6	os (event): 1	pfs (month): 0.6	pfs (event): 1	hot phenotype: -0.669266226155647	hot score: COLD	-1.92133	3.28812	0
Targeted RNA of patient number 53	AUP	site: AUP	age: 52	Sex: M	tobacco status: 1	alcohol status: 1	immunotherapy line: 5	best response on immunotherapy (recist): PD	os (month): 3.7	os (event): 1	pfs (month): 3.7	pfs (event): 1	hot phenotype: -0.569344690171232	hot score: COLD	0.66866	5.00619	0
Targeted RNA of patient number 55	Oropharynx	site: Oropharynx	age: 55	Sex: M	tobacco status: 1	alcohol status: 1	immunotherapy line: 3	best response on immunotherapy (recist): PD	os (month): 0.3	os (event): 1	pfs (month): 0.3	pfs (event): 1	hot phenotype: -0.637239142962864	hot score: COLD	-0.964357	4.93986	1
Targeted RNA of patient number 56	Oropharynx	site: Oropharynx	age: 67	Sex: M	tobacco status: 0	alcohol status: 1	immunotherapy line: 4	best response on immunotherapy (recist): SD	os (month): 3	os (event): 1	pfs (month): 1.8	pfs (event): 1	hot phenotype: 0.656161548999103	hot score: HOT	5.03065	8.38736	1
Targeted RNA of patient number 57	Oropharynx	site: Oropharynx	age: 60	Sex: M	tobacco status: 1	alcohol status: 1	immunotherapy line: 2	best response on immunotherapy (recist): SD	os (month): 20.7	os (event): 1	pfs (month): 9.4	pfs (event): 1	hot phenotype: 0.243406754873547	hot score: HOT	6.06656	6.88019	0
Targeted RNA of patient number 59	Hypopharynx	site: Hypopharynx	age: 71	Sex: M	tobacco status: 1	alcohol status: 1	immunotherapy line: 2	best response on immunotherapy (recist): PD	os (month): 11.2	os (event): 1	pfs (month): 5.4	pfs (event): 1	hot phenotype: 0.697584177449719	hot score: HOT	4.20996	7.79309	0
Targeted RNA of patient number 61	Oral cavity	site: Oral cavity	age: 58	Sex: M	tobacco status: 1	alcohol status: 1	immunotherapy line: 2	best response on immunotherapy (recist): CR	os (month): 30.8	os (event): 0	pfs (month): 30.8	pfs (event): 0	hot phenotype: 0.580968302338969	hot score: HOT	3.68095	6.79689	0
Targeted RNA of patient number 63	Oropharynx	site: Oropharynx	age: 52	Sex: M	tobacco status: 1	alcohol status: 1	immunotherapy line: 1	best response on immunotherapy (recist): SD	os (month): 4.1	os (event): 1	pfs (month): 4.1	pfs (event): 1	hot phenotype: -0.704495350885317	hot score: COLD	1.73135	5.07825	0
Targeted RNA of patient number 64	Oral cavity	site: Oral cavity	age: 61	Sex: F	tobacco status: 1	alcohol status: 1	immunotherapy line: 1	best response on immunotherapy (recist): PD	os (month): 0.6	os (event): 1	pfs (month): 0.6	pfs (event): 1	hot phenotype: -0.106239195427363	hot score: COLD	5.47015	6.04806	0
Targeted RNA of patient number 66	Oropharynx	site: Oropharynx	age: 75	Sex: M	tobacco status: 1	alcohol status: 1	immunotherapy line: 1	best response on immunotherapy (recist): PD	os (month): 10.1	os (event): 1	pfs (month): 3	pfs (event): 1	hot phenotype: 0.560191695085001	hot score: HOT	5.07672	7.49547	0
Targeted RNA of patient number 67	Oral cavity	site: Oral cavity	age: 68	Sex: M	tobacco status: 1	alcohol status: 1	immunotherapy line: 1	best response on immunotherapy (recist): PD	os (month): 28.8	os (event): 1	pfs (month): 1.4	pfs (event): 1	hot phenotype: 0.404523876777653	hot score: HOT	3.16018	6.37037	0
Targeted RNA of patient number 68	Oropharynx	site: Oropharynx	age: 53	Sex: F	tobacco status: 1	alcohol status: 1	immunotherapy line: 1	best response on immunotherapy (recist): PD	os (month): 1.4	os (event): 1	pfs (month): 1.4	pfs (event): 1	hot phenotype: -0.25724516597181	hot score: COLD	2.10578	5.82342	1
Targeted RNA of patient number 69	Oropharynx	site: Oropharynx	age: 88	Sex: M	tobacco status: 1	alcohol status: 0	immunotherapy line: 1	best response on immunotherapy (recist): SD	os (month): 7.6	os (event): 1	pfs (month): 7.6	pfs (event): 1	hot phenotype: 0.7227749750022	hot score: HOT	5.84829	8.94971	0
Targeted RNA of patient number 73	Oral cavity	site: Oral cavity	age: 45	Sex: F	tobacco status: 0	alcohol status: 0	immunotherapy line: 1	best response on immunotherapy (recist): PD	os (month): 0.5	os (event): 1	pfs (month): 0.5	pfs (event): 1	hot phenotype: 0.767277836945991	hot score: HOT	5.15696	8.01169	1
Targeted RNA of patient number 74	Oral cavity	site: Oral cavity	age: 49	Sex: M	tobacco status: 1	alcohol status: 1	immunotherapy line: 1	best response on immunotherapy (recist): PD	os (month): 2.8	os (event): 1	pfs (month): 2.8	pfs (event): 1	hot phenotype: -0.453569609284098	hot score: COLD	2.89236	4.65522	0
Targeted RNA of patient number 77	Oropharynx	site: Oropharynx	age: 57	Sex: F	tobacco status: 0	alcohol status: 0	immunotherapy line: 1	best response on immunotherapy (recist): PD	os (month): 2.4	os (event): 1	pfs (month): 1.3	pfs (event): 1	hot phenotype: -0.328452521687602	hot score: COLD	2.63759	5.68155	0
Targeted RNA of patient number 82	Oropharynx	site: Oropharynx	age: 75	Sex: M	tobacco status: 1	alcohol status: 1	immunotherapy line: 2	best response on immunotherapy (recist): PD	os (month): 3.3	os (event): 1	pfs (month): 1.1	pfs (event): 1	hot phenotype: -0.453654667331917	hot score: COLD	4.85222	5.26629	0
Targeted RNA of patient number 83	Oropharynx	site: Oropharynx	age: 87	Sex: F	tobacco status: 0	alcohol status: 0	immunotherapy line: 2	best response on immunotherapy (recist): CR	os (month): 26.9	os (event): 0	pfs (month): 26.9	pfs (event): 0	hot phenotype: 0.66758950220346	hot score: HOT	4.81334	8.58964	1
Targeted RNA of patient number 84	Oral cavity	site: Oral cavity	age: 70	Sex: F	tobacco status: 0	alcohol status: 0	immunotherapy line: 2	best response on immunotherapy (recist): PD	os (month): 5.6	os (event): 1	pfs (month): 3.6	pfs (event): 1	hot phenotype: -0.183126677701371	hot score: COLD	4.021	4.54932	0
Targeted RNA of patient number 86	Oropharynx	site: Oropharynx	age: 56	Sex: M	tobacco status: 1	alcohol status: 1	immunotherapy line: 2	best response on immunotherapy (recist): PD	os (month): 3.6	os (event): 1	pfs (month): 2.7	pfs (event): 1	hot phenotype: -0.511325258018997	hot score: COLD	-0.128199	5.07415	0
Targeted RNA of patient number 88	Oropharynx	site: Oropharynx	age: 55	Sex: M	tobacco status: 1	alcohol status: 1	immunotherapy line: 1	best response on immunotherapy (recist): PD	os (month): 1.3	os (event): 1	pfs (month): 1.3	pfs (event): 1	hot phenotype: 0.0951592872265685	hot score: HOT	4.11227	6.23895	0
Targeted RNA of patient number 89	Oral cavity	site: Oral cavity	age: 50	Sex: M	tobacco status: 1	alcohol status: 1	immunotherapy line: 2	best response on immunotherapy (recist): PD	os (month): 2.5	os (event): 1	pfs (month): 1.7	pfs (event): 1	hot phenotype: -0.224804772864401	hot score: COLD	3.06047	5.81498	0
Targeted RNA of patient number 90	Oral cavity	site: Oral cavity	age: 49	Sex: M	tobacco status: 0	alcohol status: 0	immunotherapy line: 2	best response on immunotherapy (recist): PD	os (month): 3.8	os (event): 1	pfs (month): 0.7	pfs (event): 1	hot phenotype: 0.65262196922533	hot score: HOT	4.38882	7.62349	0
Targeted RNA of patient number 91	Oral cavity	site: Oral cavity	age: 66	Sex: M	tobacco status: 1	alcohol status: 1	immunotherapy line: 1	best response on immunotherapy (recist): SD	os (month): 6.4	os (event): 1	pfs (month): 4.2	pfs (event): 1	hot phenotype: -0.563311993294833	hot score: COLD	1.882	4.49712	0
Targeted RNA of patient number 92	Oropharynx	site: Oropharynx	age: 75	Sex: M	tobacco status: 0	alcohol status: 1	immunotherapy line: 1	best response on immunotherapy (recist): SD	os (month): 28.9	os (event): 1	pfs (month): 3.9	pfs (event): 1	hot phenotype: -0.270463303106621	hot score: COLD	3.0654	6.79354	1
Targeted RNA of patient number 93	Oropharynx	site: Oropharynx	age: 86	Sex: M	tobacco status: 0	alcohol status: 1	immunotherapy line: 1	best response on immunotherapy (recist): SD	os (month): 3.7	os (event): 1	pfs (month): 3.7	pfs (event): 1	hot phenotype: -0.151666461801575	hot score: COLD	4.80177	6.53837	1
Targeted RNA of patient number 94	Oropharynx	site: Oropharynx	age: 68	Sex: M	tobacco status: 1	alcohol status: 0	immunotherapy line: 1	best response on immunotherapy (recist): PR	os (month): 26	os (event): 0	pfs (month): 26	pfs (event): 0	hot phenotype: 0.451077805730104	hot score: HOT	2.35409	5.84538	0
Targeted RNA of patient number 95	Oral cavity	site: Oral cavity	age: 60	Sex: M	tobacco status: 0	alcohol status: 1	immunotherapy line: 1	best response on immunotherapy (recist): PD	os (month): 25	os (event): 0	pfs (month): 2.9	pfs (event): 1	hot phenotype: -0.31162099370224	hot score: COLD	2.771	3.47911	0
Targeted RNA of patient number 96	Oral cavity	site: Oral cavity	age: 57	Sex: M	tobacco status: 1	alcohol status: 1	immunotherapy line: 2	best response on immunotherapy (recist): PD	os (month): 1.6	os (event): 1	pfs (month): 1.6	pfs (event): 1	hot phenotype: -0.459514934350282	hot score: COLD	1.74354	4.90176	0
Targeted RNA of patient number 97	Oropharynx	site: Oropharynx	age: 67	Sex: M	tobacco status: 1	alcohol status: 1	immunotherapy line: 1	best response on immunotherapy (recist): PD	os (month): 10.9	os (event): 1	pfs (month): 1.5	pfs (event): 1	hot phenotype: 0.560457791197241	hot score: HOT	4.98025	7.06746	0
Targeted RNA of patient number 98	Oropharynx	site: Oropharynx	age: 67	Sex: M	tobacco status: 1	alcohol status: 1	immunotherapy line: 1	best response on immunotherapy (recist): PR	os (month): 21.8	os (event): 0	pfs (month): 21.8	pfs (event): 0	hot phenotype: 0.584416397960727	hot score: HOT	4.02934	7.93196	0
Targeted RNA of patient number 99	Hypopharynx	site: Hypopharynx	age: 67	Sex: M	tobacco status: 1	alcohol status: 1	immunotherapy line: 1	best response on immunotherapy (recist): SD	os (month): 1.3	os (event): 1	pfs (month): 1.3	pfs (event): 1	hot phenotype: -0.542330348333211	hot score: COLD	2.37507	5.95326	0
